# Supplementary material for: Promoting photocatalytic CO2 reduction with a molecular copper purpurin chromophore
Source: PubMed Central journal article supplement (PMC7987958; doi:10.1038/s41467-021-21923-9), 2021-03-23
Supplement: 41467_2021_21923_MOESM1_ESM.pdf [file 41467_2021_21923_MOESM1_ESM.pdf]

# **Supporting Information**

## **Promoting photocatalytic CO<sub>2</sub> reduction with a molecular copper purpurin chromophore**

Yuan et al.

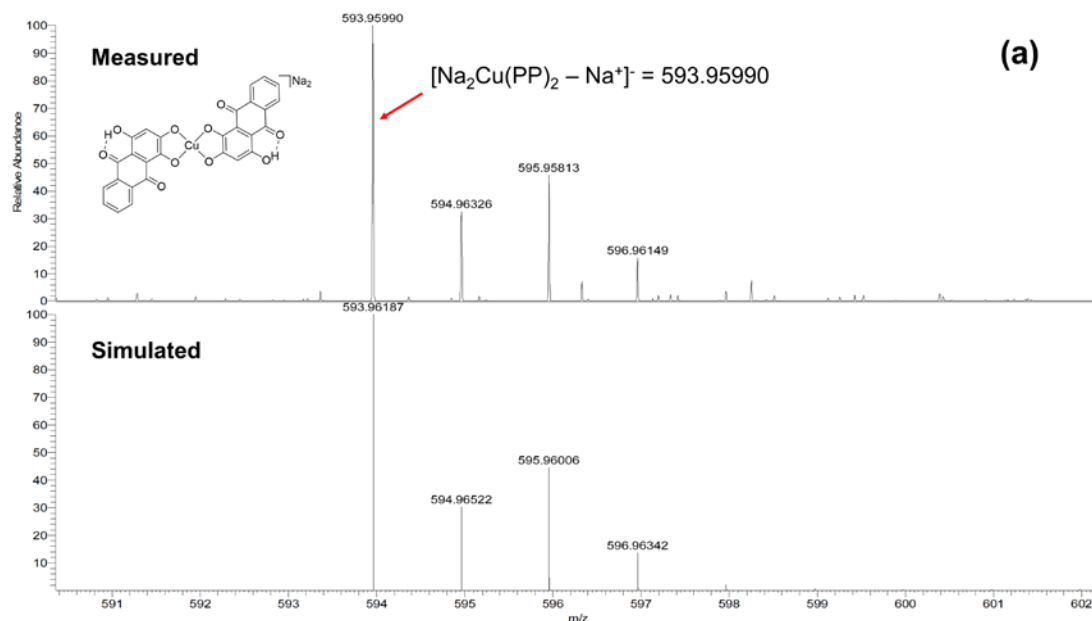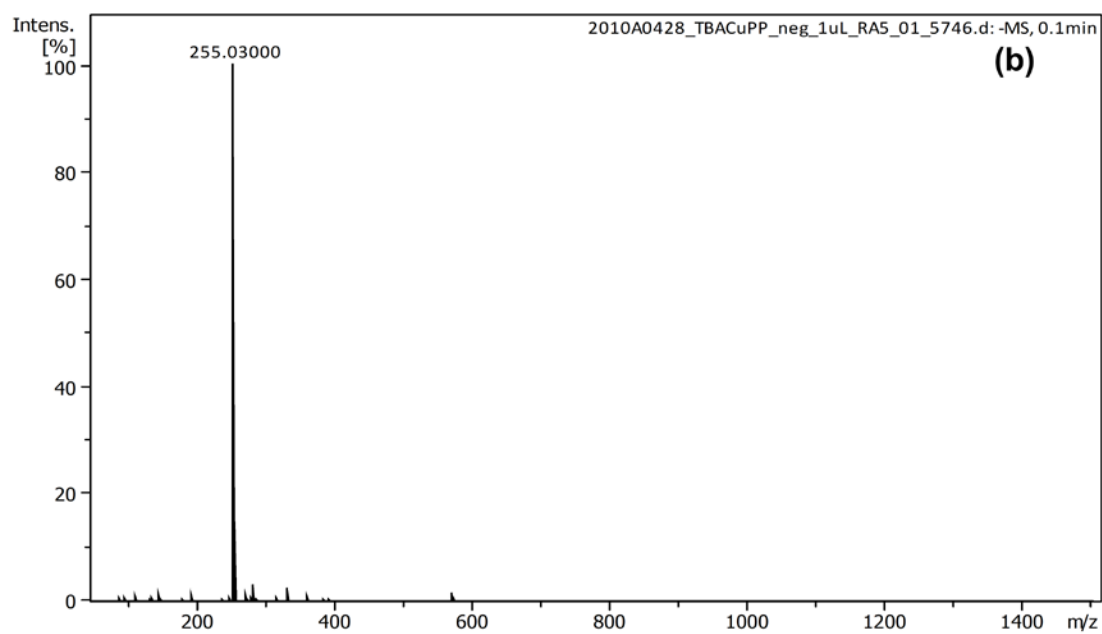

**Supplementary Figure 1. HRMS spectra.** HRMS spectra of  $\text{Na}_2\text{Cu}(\text{PP})_2$  (a) and  $(\text{TBA})_2(\text{CuPP})_2$  (b) in  $\text{CH}_3\text{OH}$  (negative ion mode).

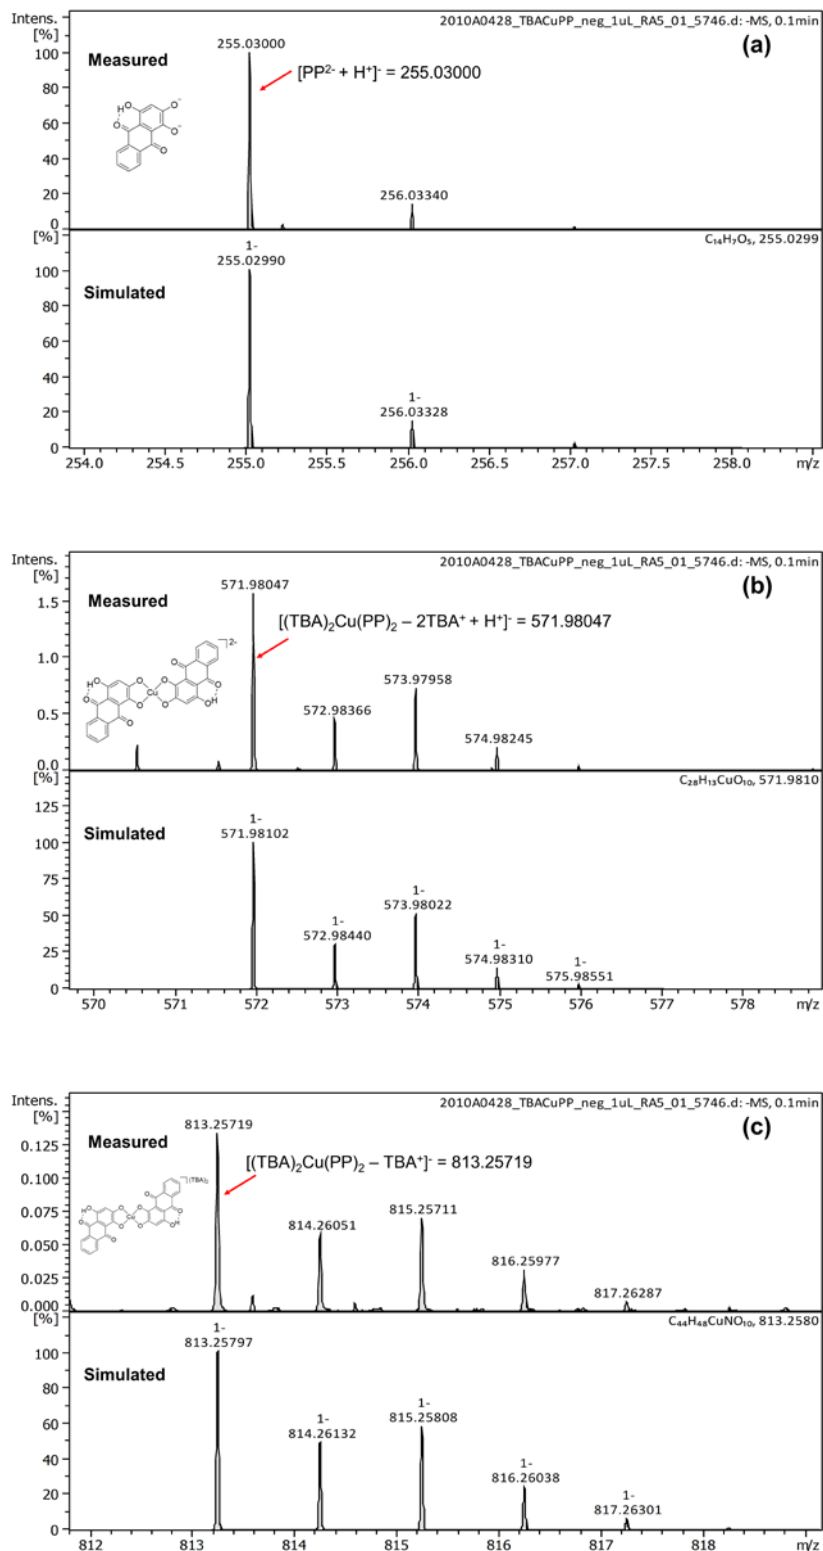

**Supplementary Figure 2. HRMS spectra.** HRMS spectra (magnification of Supplementary Figure 1b) of  $(\text{TBA})_2(\text{CuPP})_2$  in  $\text{CH}_3\text{OH}$  (negative ion mode). The most intense signal is at  $m/z$   $[(\text{PP}^{2-} + \text{H}^+)]^- = 255.03000$  (calcd: 255.02990) (a); A peak at  $m/z = 571.98047$  (calcd: 571.98102) corresponds to a fragment of  $[(\text{TBA})_2\text{Cu}(\text{PP})_2 - 2\text{TBA}^+ + \text{H}^+]$  (b); A peak at  $m/z = 813.25719$  (calcd: 813.25797) corresponds to of  $[(\text{TBA})_2\text{Cu}(\text{PP})_2 - \text{TBA}^+]$  (c).

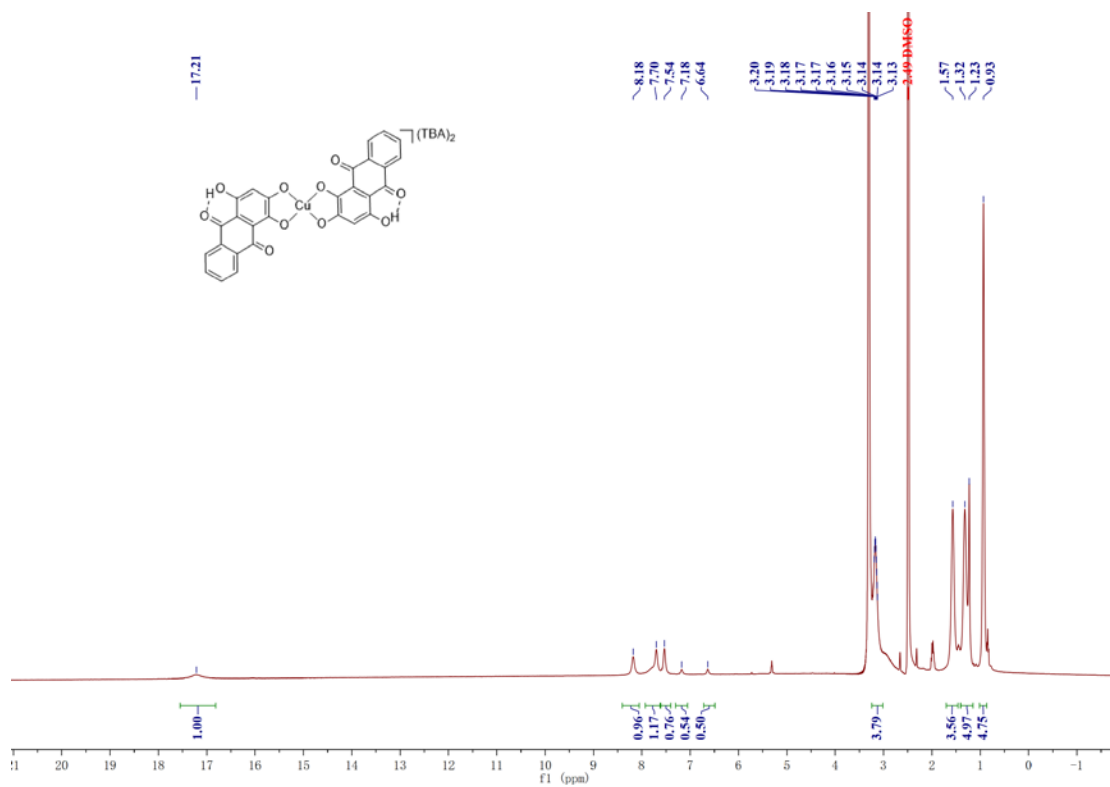

**Supplementary Figure 3. <sup>1</sup>H NMR spectrum.** <sup>1</sup>H NMR spectrum of CuPP in *d*<sub>6</sub>-DMSO.

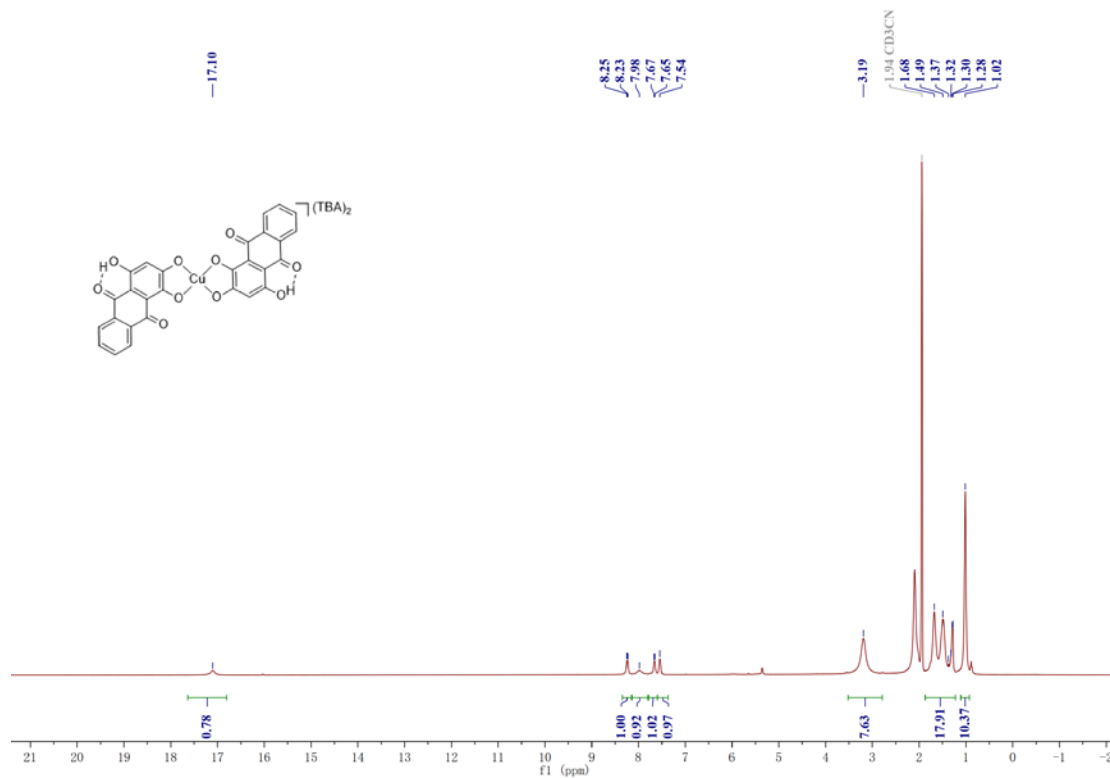

**Supplementary Figure 4. <sup>1</sup>H NMR spectrum.** <sup>1</sup>H NMR spectrum of CuPP in CD<sub>3</sub>CN.

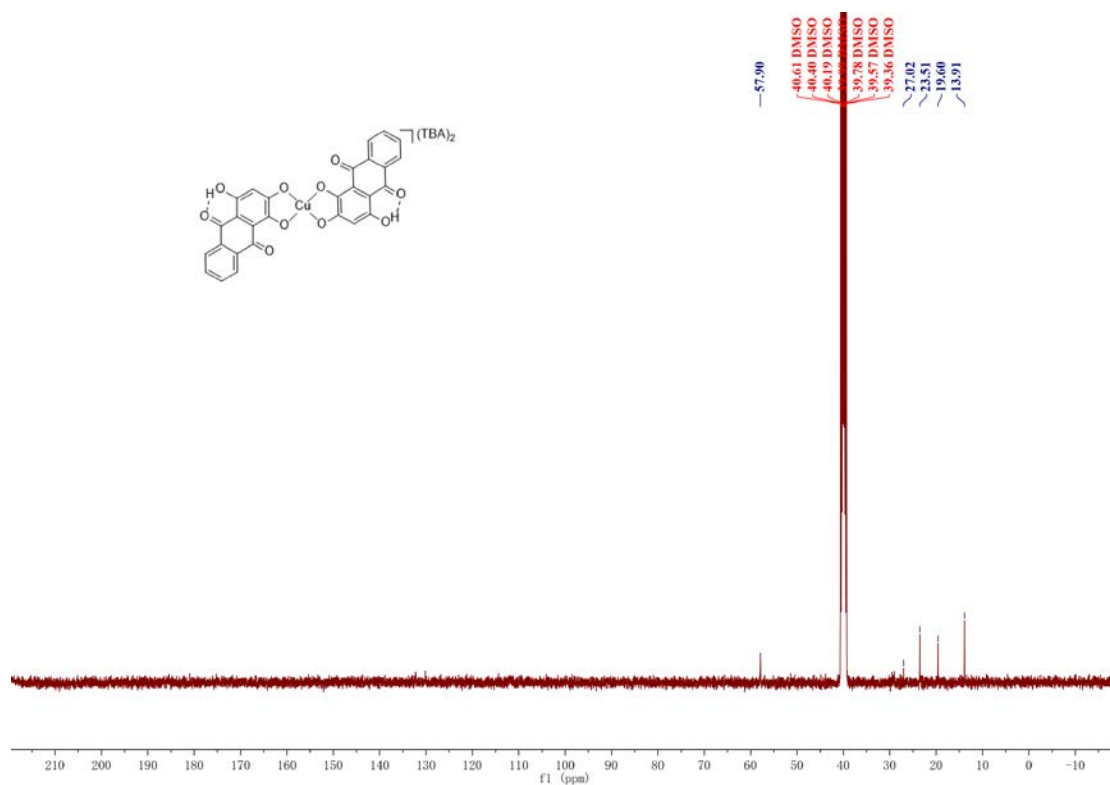

**Supplementary Figure 5.  $^{13}\text{C}$  NMR spectrum.**  $^{13}\text{C}$  NMR spectrum of CuPP in  $d_6$ -DMSO.

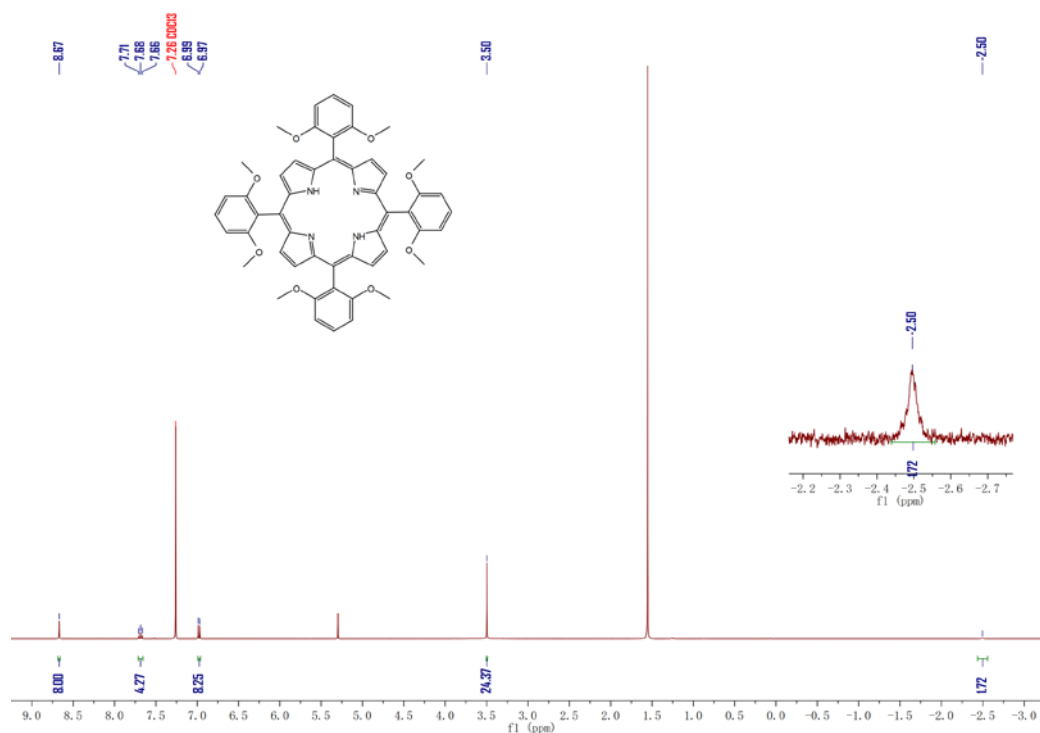

**Supplementary Figure 6.  $^1\text{H}$  NMR spectrum.**  $^1\text{H}$  NMR spectrum of 5, 10, 15, 20-tetrakis(2',6'-dimethoxyphenyl)-21H,23H-porphyrin in  $\text{CDCl}_3$ .

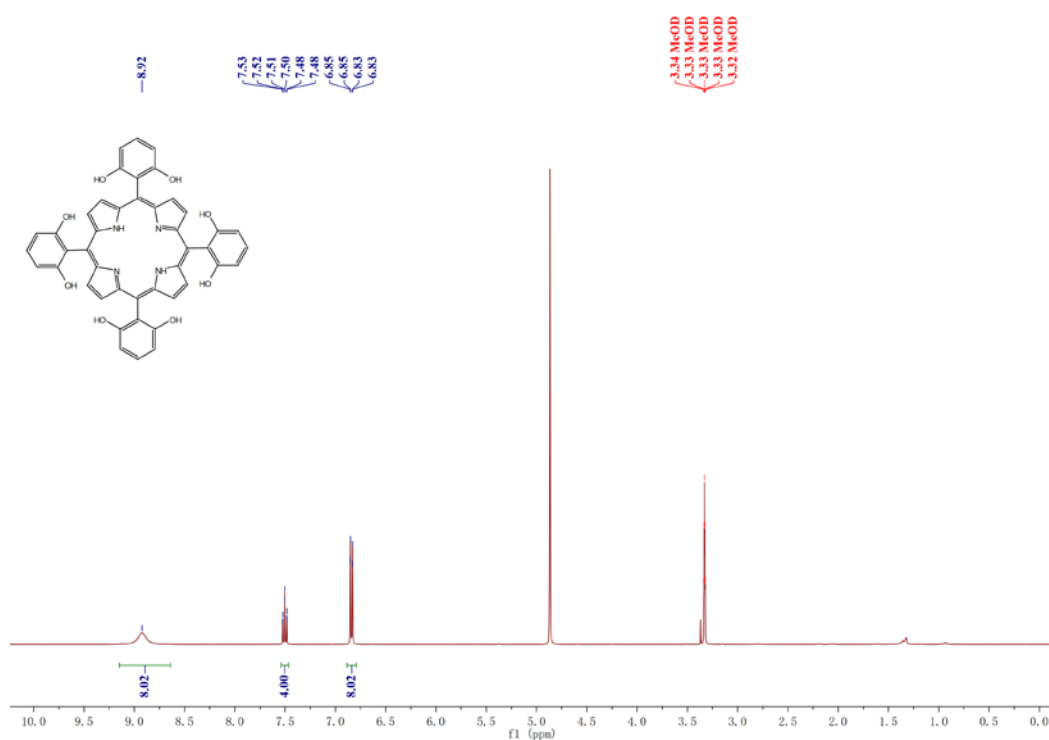

**Supplementary Figure 7.  $^1\text{H}$  NMR spectrum.**  $^1\text{H}$  NMR spectrum of 5, 10, 15, 20-tetrakis(2',6'-dihydroxyphenyl)-21H,23H-porphyrin in  $\text{CD}_3\text{OD}$ .

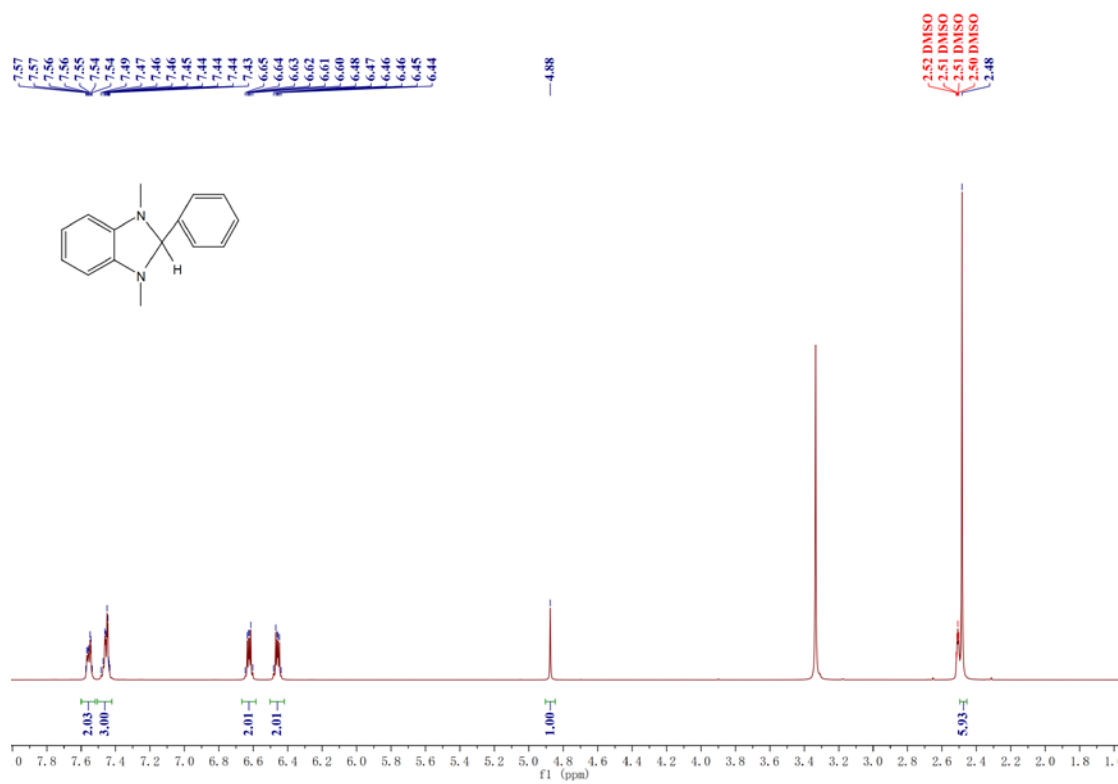

**Supplementary Figure 8.  $^1\text{H}$  NMR spectrum.**  $^1\text{H}$  NMR spectrum of BIH in  $d_6$ -DMSO.

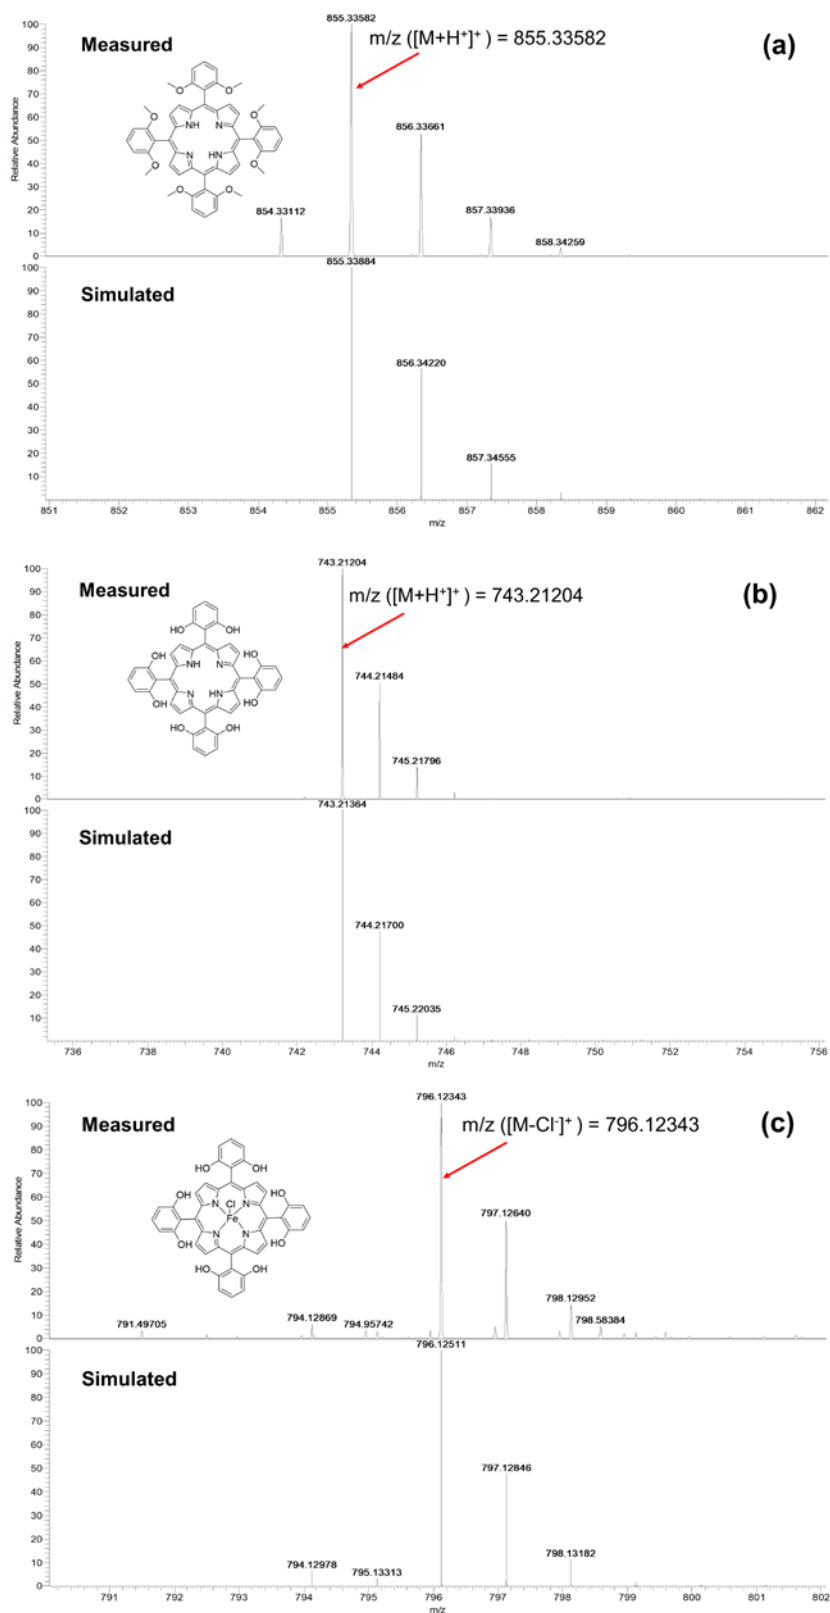

**Supplementary Figure 9. HRMS spectra.** HRMS spectra of 5, 10, 15, 20-tetrakis(2',6'-dimethoxyphenyl)-21H,23H-porphyrin (a); 5, 10, 15, 20-tetrakis(2',6'-dihydroxyphenyl)-21H,23H-porphyrin (b); and chloro iron (III) 5, 10, 15, 20-tetrakis(2',6'-dihydroxyphenyl)-21H,23H-porphyrin (FeTDHPP) (c) in  $\text{CH}_3\text{OH}$  (positive ion mode).

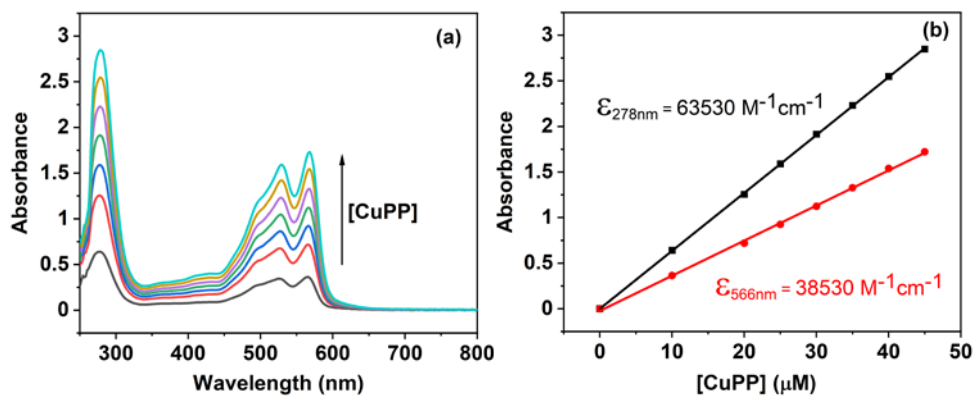

**Supplementary Figure 10. UV-vis spectra.** UV-vis spectra of CuPP at different concentrations (a); linear plots of absorbance at 278 nm (black) and 566 nm (red) (b).

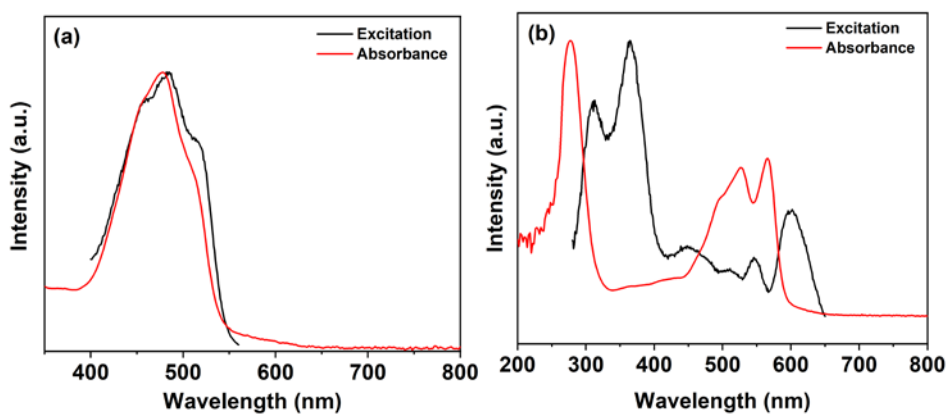

**Supplementary Figure 11. Excitation and absorbance spectra.** Normalized excitation and absorbance spectra of PP (a) and CuPP (b) at 298 K in DMF.

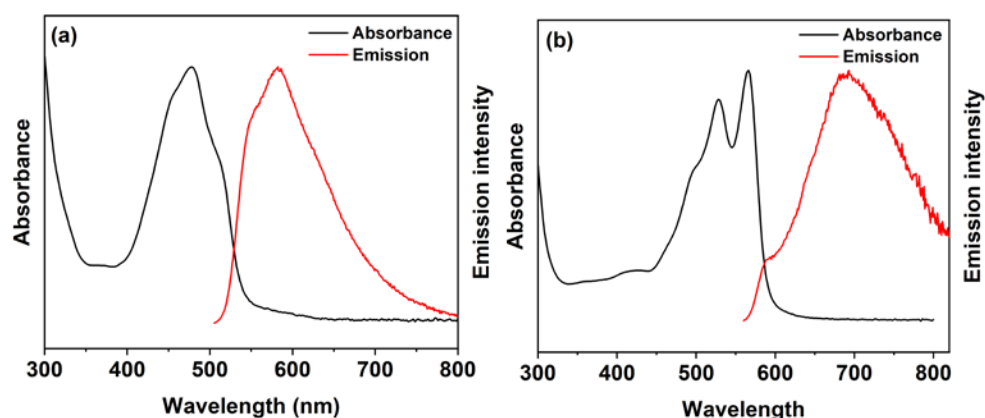

**Supplementary Figure 12. Absorbance and emission spectra.** Normalized absorbance and emission spectra of PP (a,  $\lambda_{\text{exc}}$ : 484 nm) and CuPP (b,  $\lambda_{\text{exc}}$ : 540 nm) at 298 K in DMF.



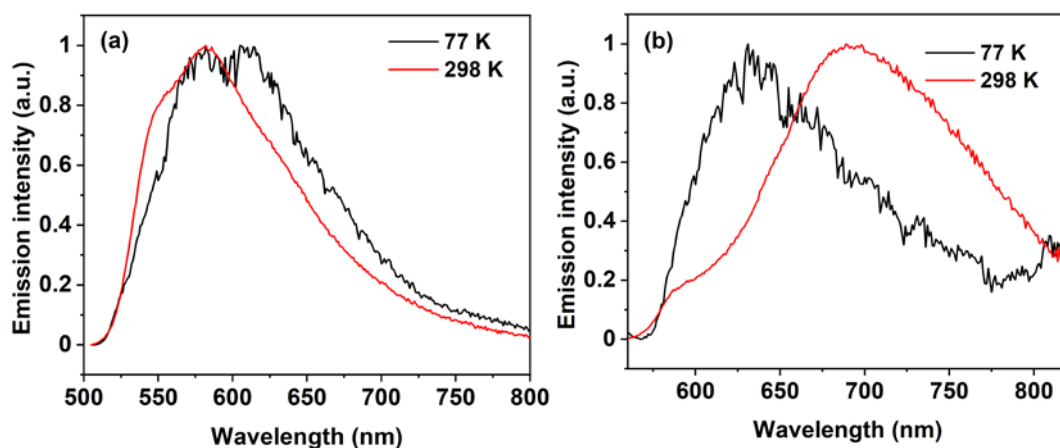

**Supplementary Figure 13. Emission spectra.** Normalized emission spectra of PP (a,  $\lambda_{\text{exc}}$ : 484 nm) and CuPP (b,  $\lambda_{\text{exc}}$ : 540 nm) at 298 K and 77K in DMF.

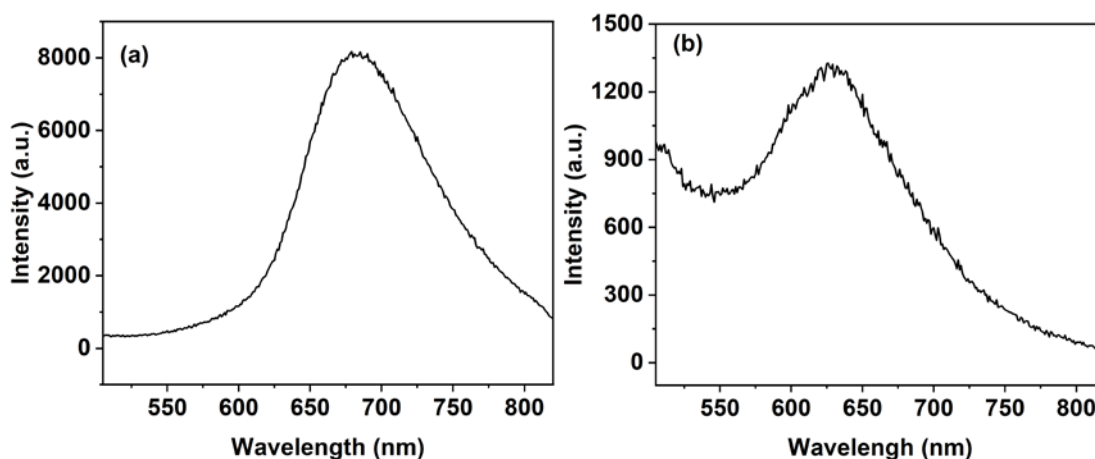

**Supplementary Figure 14. Emission spectra.** Solid state emission spectra of PP (a) and CuPP (b) with excitation wavelength of 350 nm at 298 K.

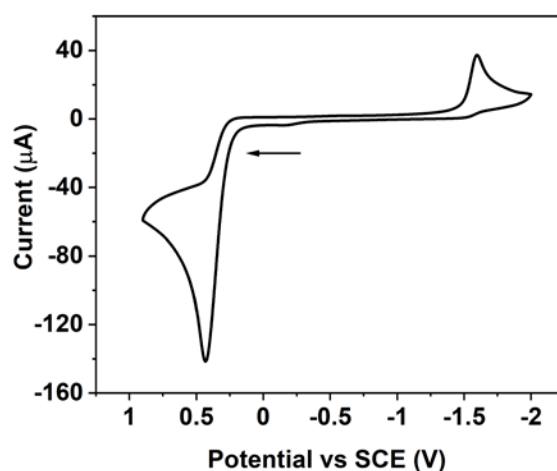

**Supplementary Figure 15. Electrochemical study.** CV of BIH (5 mM) in DMF containing 0.1M TBAPF<sub>6</sub> at 0.1 V/s scan rate.

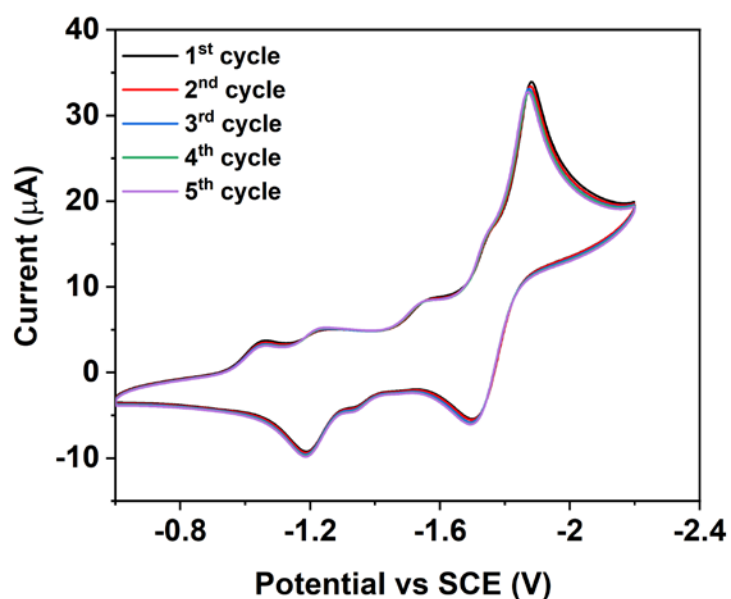

**Supplementary Figure 16. Electrochemical study.** CV of CuPP (1 mM) with multiple scans in DMF containing 0.1M TBAPF<sub>6</sub> at 0.1 V/s scan rate.

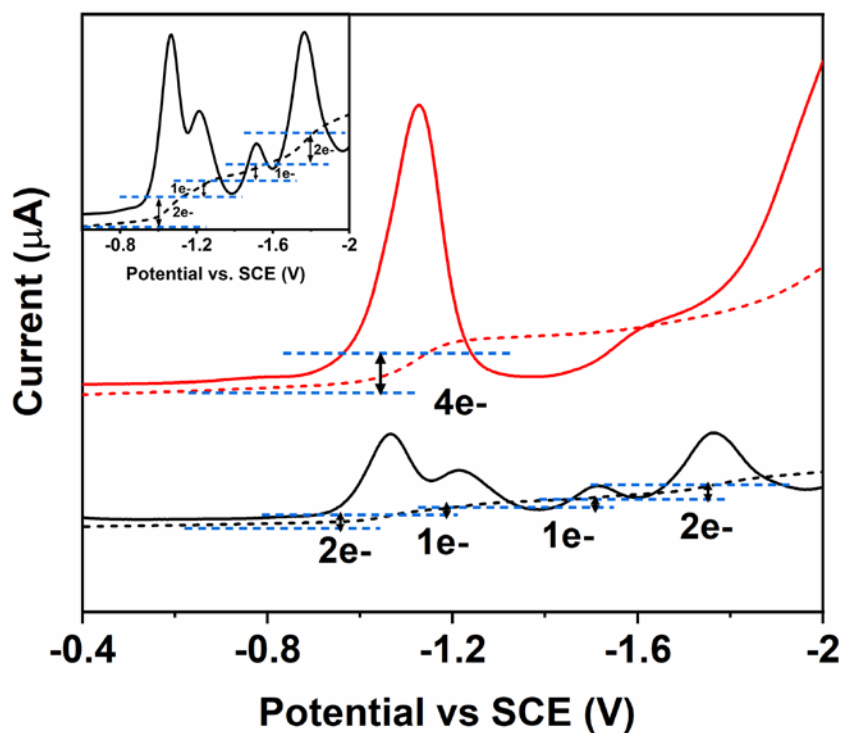

**Supplementary Figure 17. Electrochemical study.** SWV of 1 mM CuPP under N<sub>2</sub> (black solid) or CO<sub>2</sub> (red solid) in DMF containing 0.1 M TBAPF<sub>6</sub> at scan rate 0.1 V/s; dash lines show integrals for reduction waves. Inset: magnification of the SWV under N<sub>2</sub>.

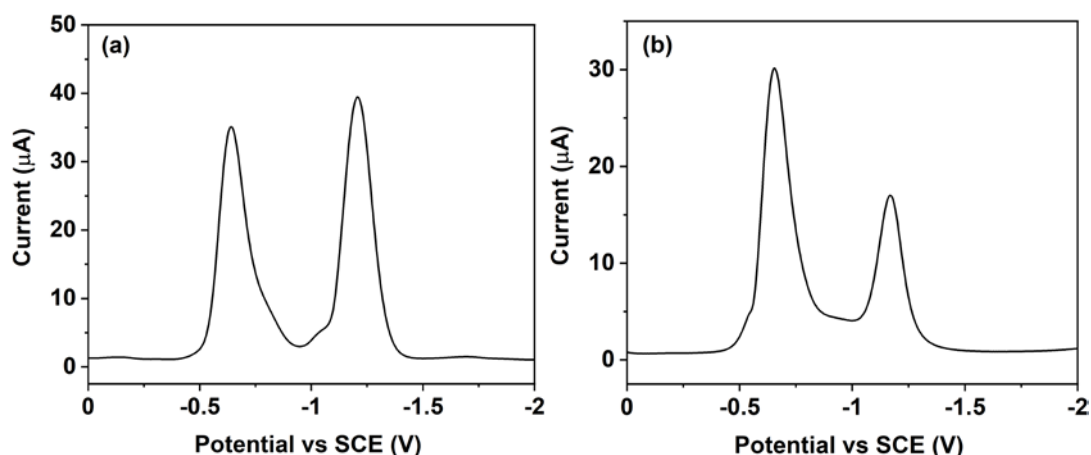

**Supplementary Figure 18. Electrochemical study.** SWV of 2 mM PP under N<sub>2</sub> (a) or CO<sub>2</sub> (b) in DMF containing 0.1M TBAPF<sub>6</sub> at 0.1 V/s scan rate.

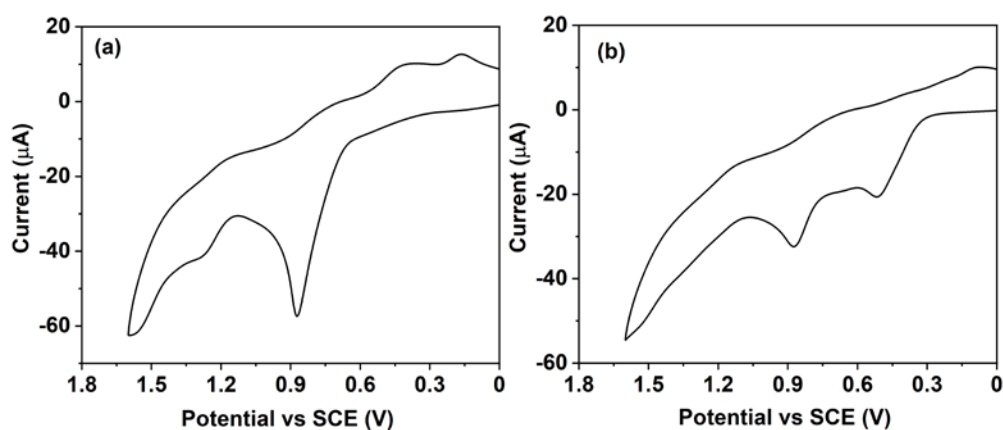

**Supplementary Figure 19. Electrochemical study.** Oxidative part of CVs of 1 mM PP (a) and 1 mM CuPP (b) in DMF containing 0.1M TBAPF<sub>6</sub> at 0.1 V/s scan rate.

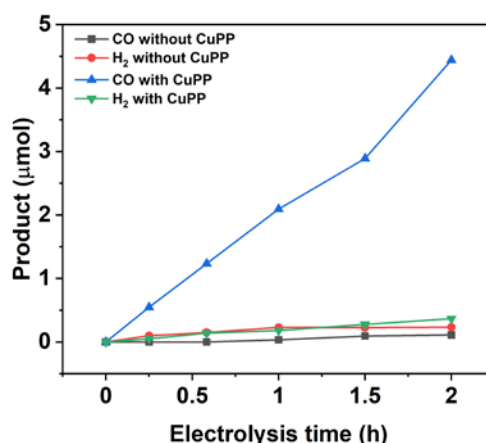

**Supplementary Figure 20. Electrocatalytic CO<sub>2</sub> reduction.** Bulk electrolysis time course for the amount of CO and H<sub>2</sub>. Condition: with or without CuPP (10 μM) under CO<sub>2</sub>-saturated DMF containing 0.1M TBAPF<sub>6</sub> at -1.89 V (vs SCE) using a carbon rod working electrode.

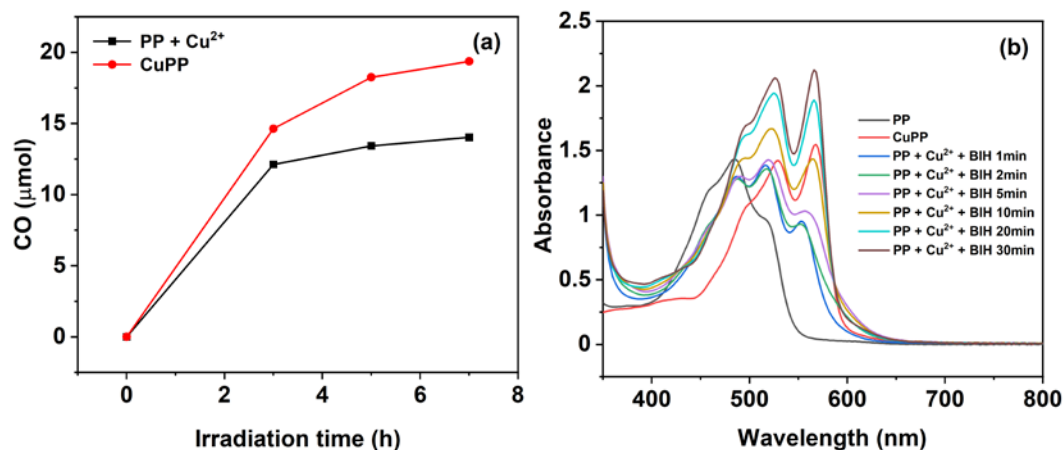

**Supplementary Figure 21. Photocatalytic CO<sub>2</sub> reduction and UV-vis spectra changes with the *in situ* generated CuPP.** (a) The amount of CO produced with the *in situ* generated CuPP (0.1 mM Cu<sup>2+</sup> and 0.2 mM PP) (black) or with isolated CuPP (red) as the photosensitizers in CO<sub>2</sub>-saturated DMF solution containing 1.0 μM FeTDHPP and 10 mM BIH; (b) UV-vis spectra changes for a solution containing 0.1 mM Cu<sup>2+</sup>, 0.2 mM PP, and 10 mM BIH in DMF. "Source data are provided as a Source Data file."

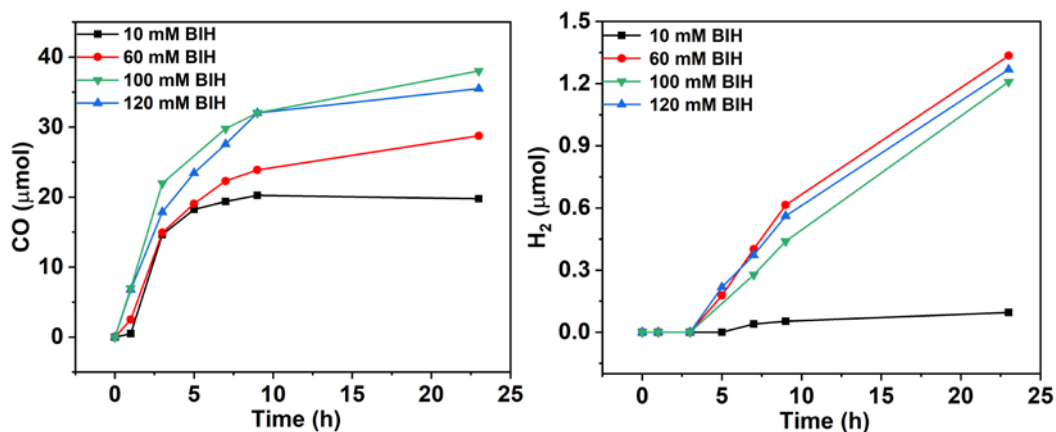

**Supplementary Figure 22. Photocatalytic CO<sub>2</sub> reduction.** CO (left) and H<sub>2</sub> (right) generation in CO<sub>2</sub>-saturated DMF solutions containing 1.0 μM FeTDHPP and 0.1 mM CuPP at different BIH concentrations. "Source data are provided as a Source Data file."

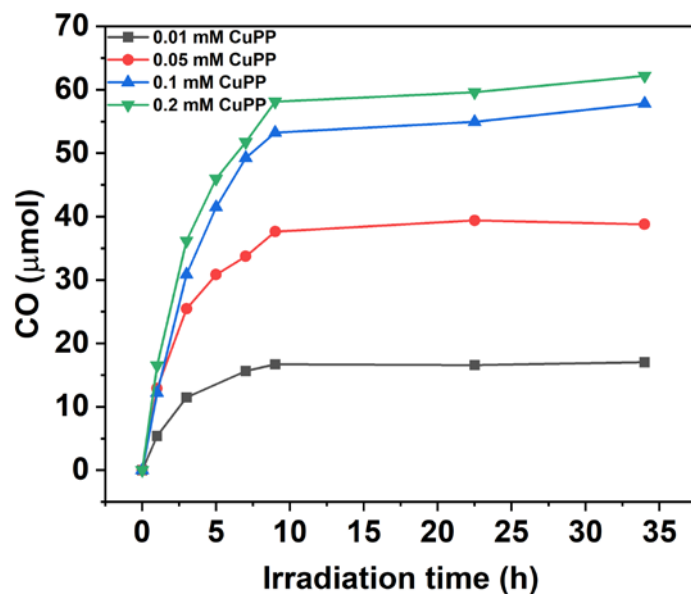

**Supplementary Figure 23. Photocatalytic CO<sub>2</sub> reduction.** CO generation in CO<sub>2</sub>-saturated DMF solutions containing 2 μM FeTDHPP and 100 mM BIH at different CuPP concentrations. "Source data are provided as a Source Data file."

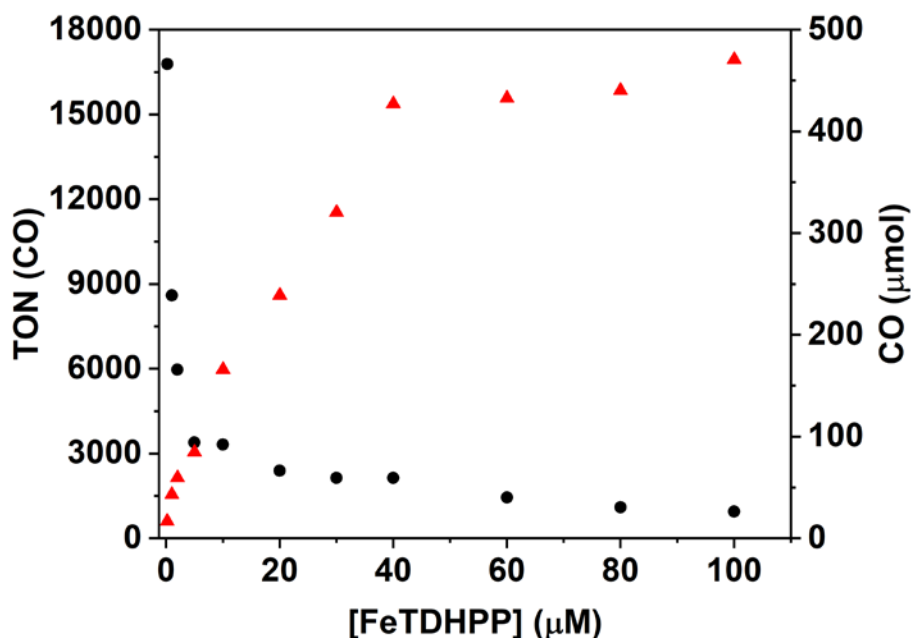

**Supplementary Figure 24. Photocatalytic CO<sub>2</sub> reduction.** TON (dot) and amounts (triangle) of CO of the photocatalytic CO<sub>2</sub> reduction experiments irradiated for 23h in CO<sub>2</sub>-saturated DMF solution containing 0.1 mM CuPP and 100 mM BIH with varying amounts of FeTDHPP. "Source data are provided as a Source Data file."

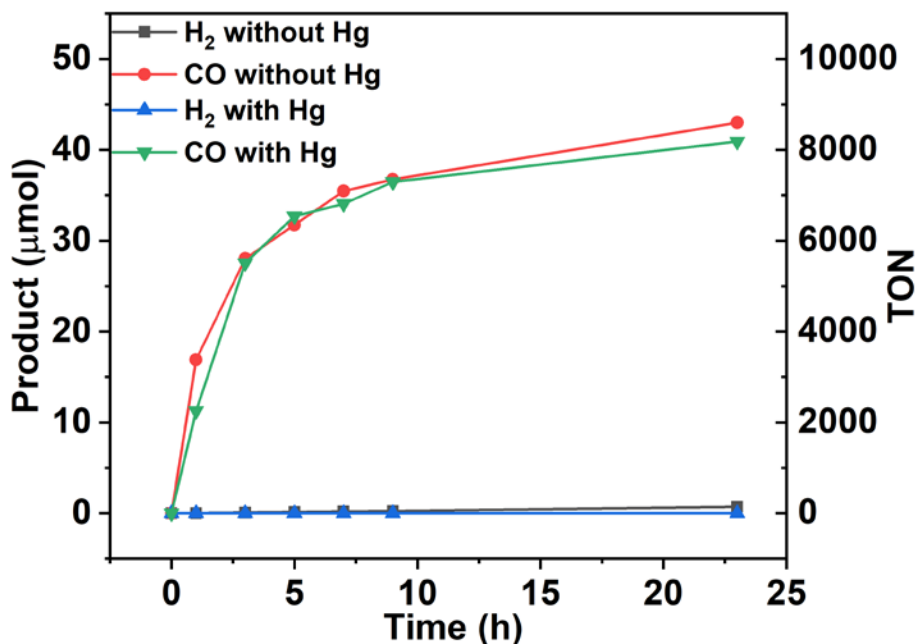

**Supplementary Figure 25. Photocatalytic CO<sub>2</sub> reduction.** Photocatalytic CO<sub>2</sub> reduction in the presence (0.02 mL, ~270000 eq. vs. catalyst) and absence of Hg in CO<sub>2</sub>-saturated DMF solution containing 0.1 mM CuPP, 1.0 μM FeTDHPP, and 100 mM BIH. "Source data are provided as a Source Data file."

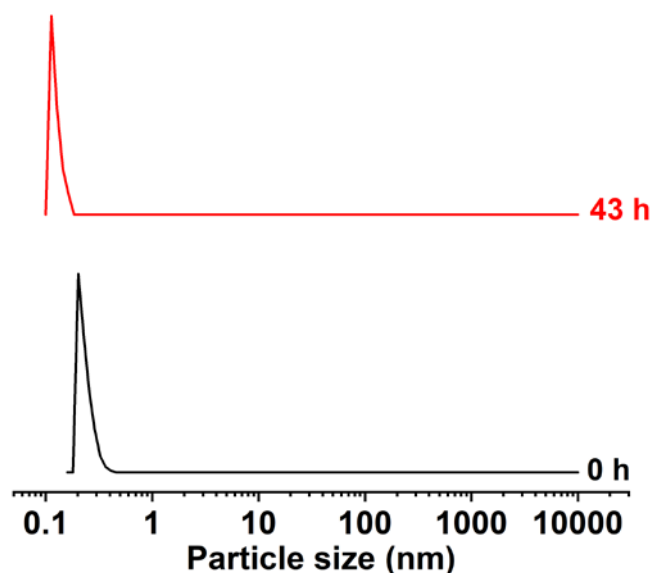

**Supplementary Figure 26. Dynamic light scattering (DLS) measurement.** Particle size distribution of a CO<sub>2</sub>-saturated DMF solution containing 0.1 mM CuPP, 1.0 μM FeTDHPP, and 100 mM BIH determined by dynamic light scattering (DLS) before and after irradiation.

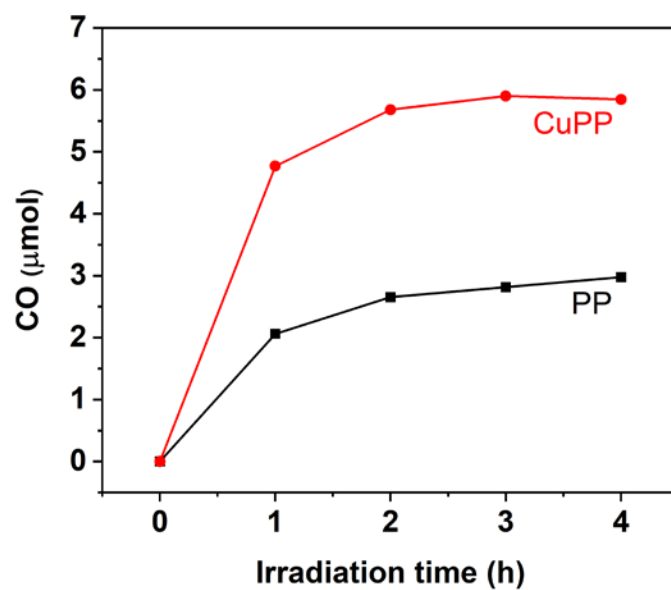

**Supplementary Figure 27. Photocatalytic CO<sub>2</sub> reduction.** Photocatalytic CO<sub>2</sub> reduction in CO<sub>2</sub>-saturated DMF solutions containing: 0.2 mM PP (black) or 0.1 mM CuPP (red), 2 μM Co(qpy)Cl<sub>2</sub> (qpy = 2,2':6',2":6",2'''-quaterpyridine)<sup>1</sup> and 30 mM BIH. "Source data are provided as a Source Data file."

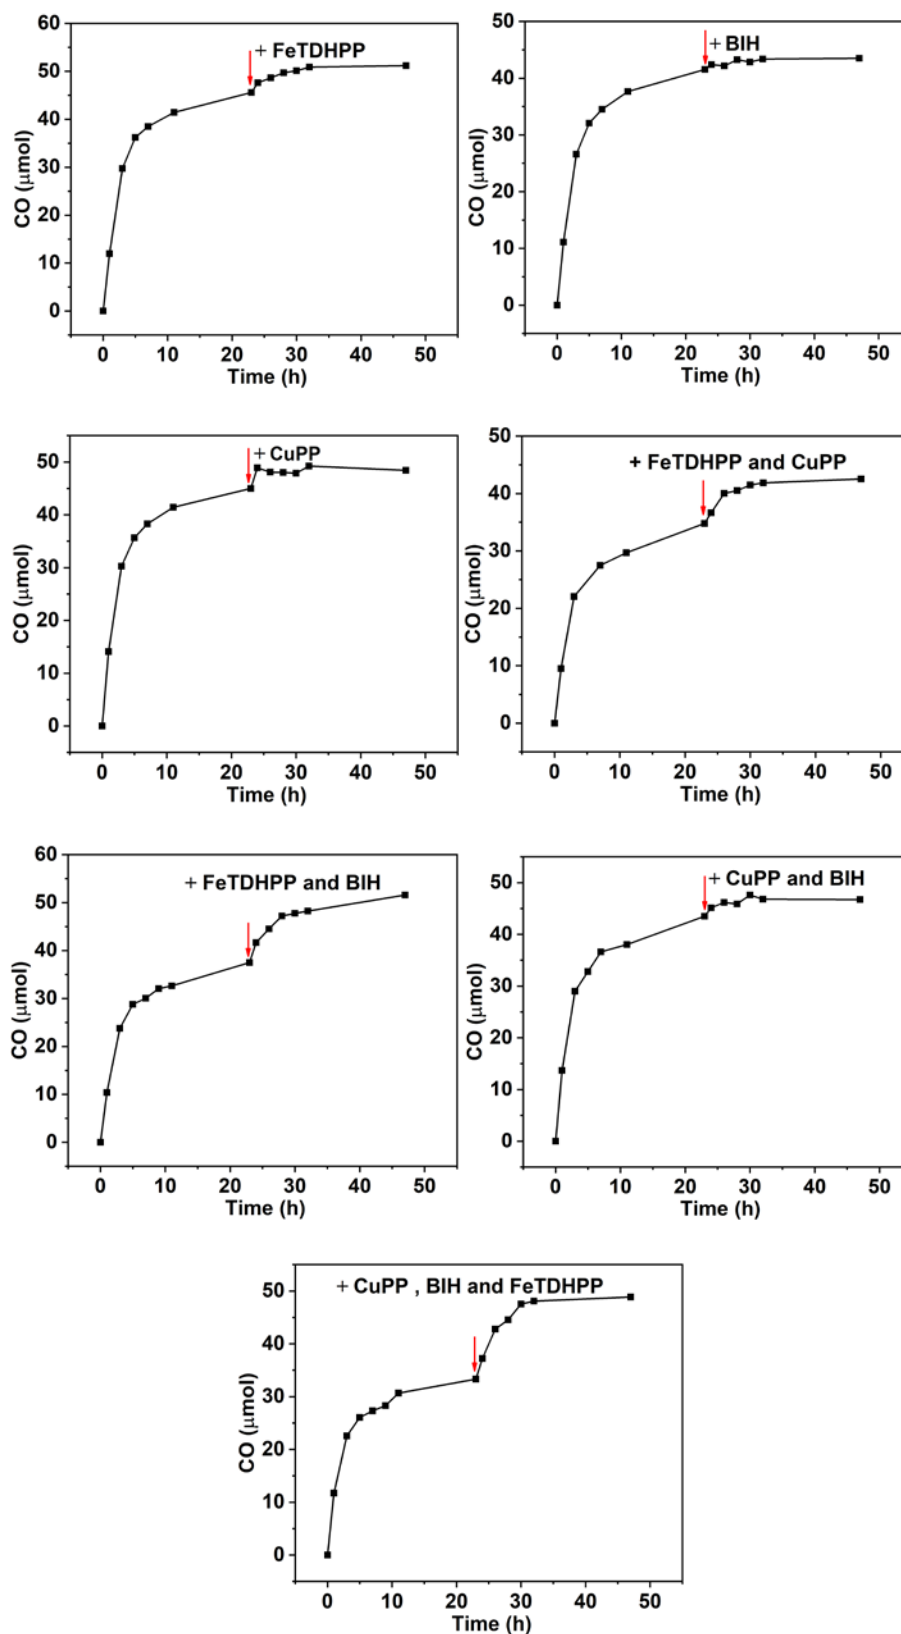

**Supplementary Figure 28. Stability tests of photocatalytic systems.** Stability tests of photocatalytic systems containing 0.1 mM CuPP, 1 μM FeTDHPP, and 100 mM BIH. The same amount of each component or their mixtures were added to reaction vials at 23 hours. "Source data are provided as a Source Data file."



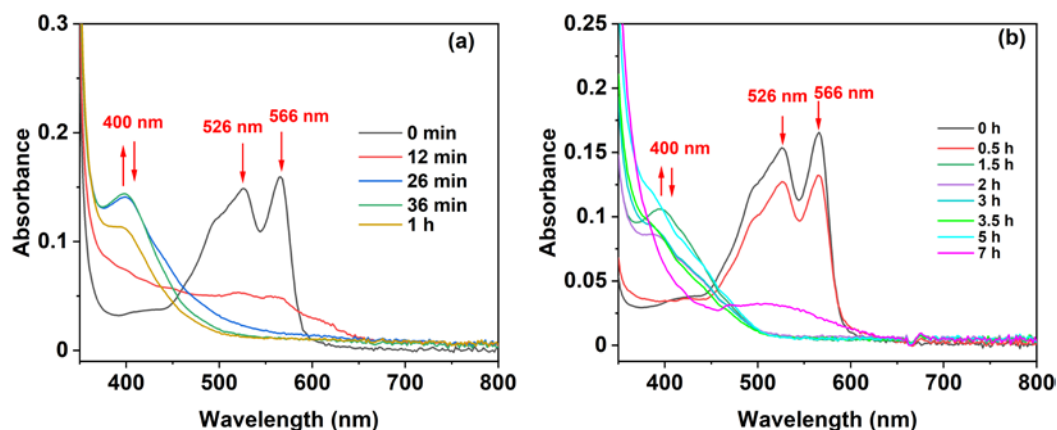

**Supplementary Figure 29. UV-vis absorption spectra.** UV-vis absorption spectra of systems containing: (a) 0.1 mM CuPP, and 100 mM BIH; (b) 0.1 mM CuPP, 0.2  $\mu$ M FeTDHPP and 10 mM BIH upon irradiation with white LED light in a 2 mm path length of quartz cuvette (dilution factor of 5).

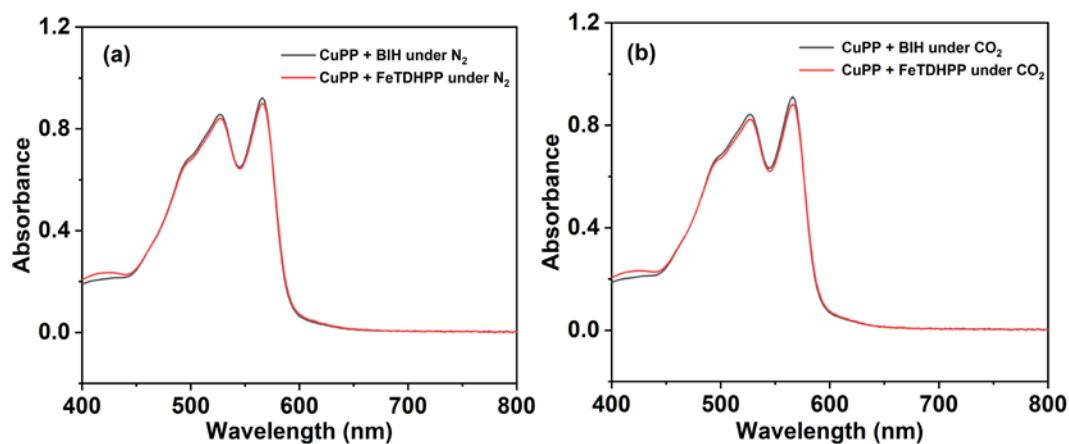

**Supplementary Figure 30. UV-vis absorption spectra.** UV-vis absorption spectra of CuPP (25  $\mu$ M) with addition of BIH (10 mM) or FeTDHPP (1  $\mu$ M) under N<sub>2</sub> (a) or CO<sub>2</sub> (b).

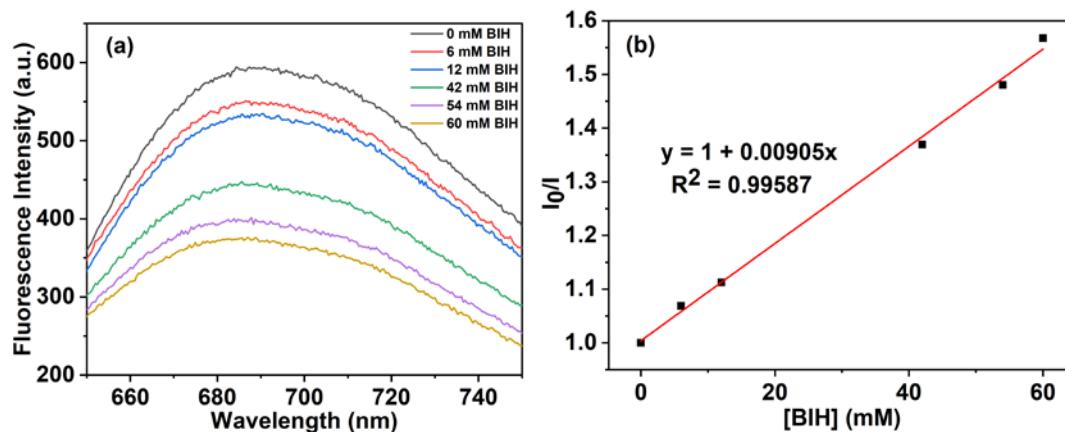

**Supplementary Figure 31. Emission quenching.** Stern-Volmer plot (b) of the emission quenching (a) ( $\lambda_{exc}$ :540 nm) of CuPP (25  $\mu$ M) by BIH in DMF. "Source data are provided as a Source Data file."

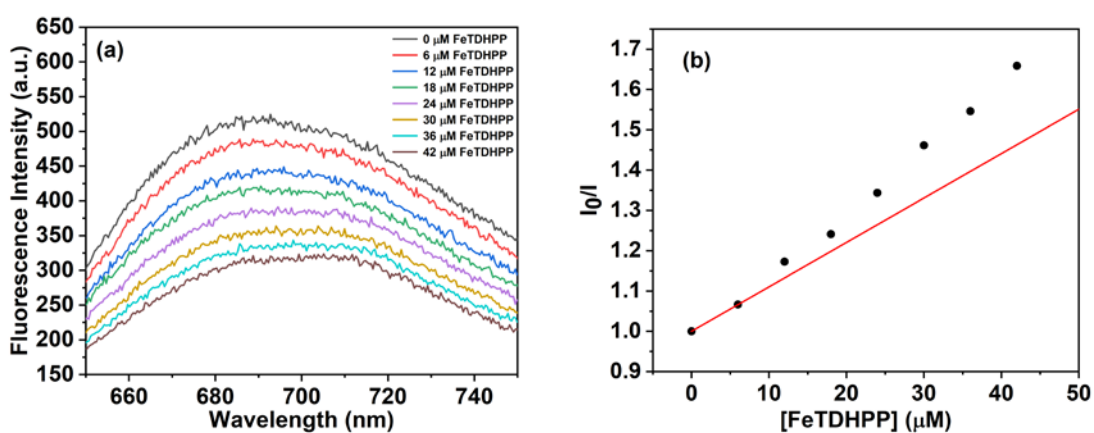

**Supplementary Figure 32. Emission quenching.** Stern-Volmer plot (b) of the emission quenching (a) ( $\lambda_{exc}$ :540 nm) of CuPP (25  $\mu$ M) by FeTDHPP. "Source data are provided as a Source Data file."

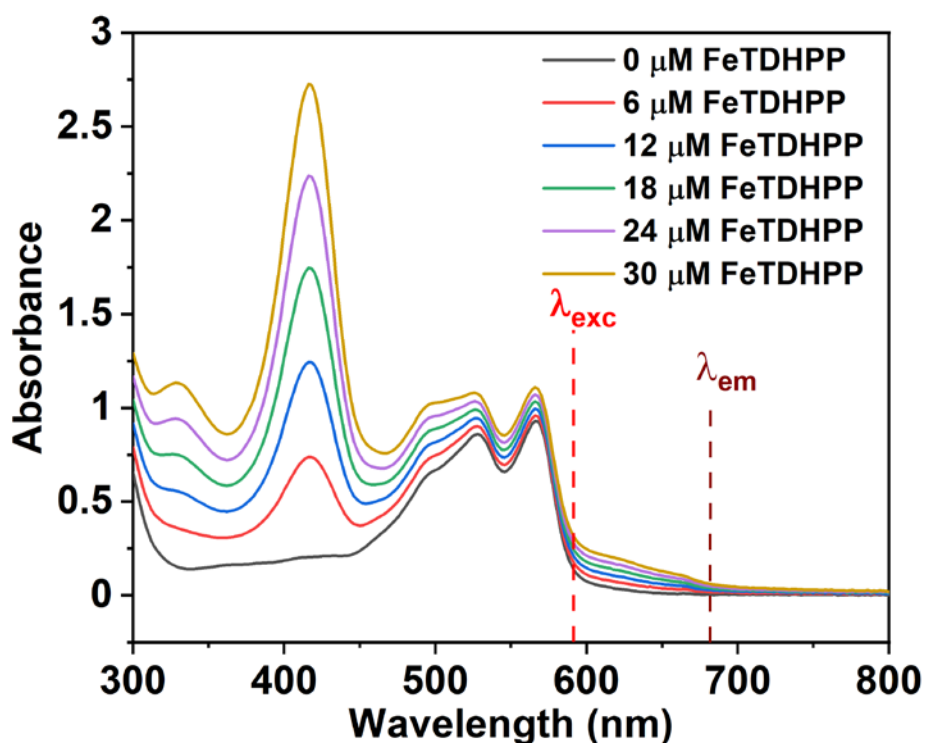

**Supplementary Figure 33. UV-vis absorption spectra.** Absorption spectra of CuPP (25  $\mu\text{M}$ ) with addition of FeTDHPP.

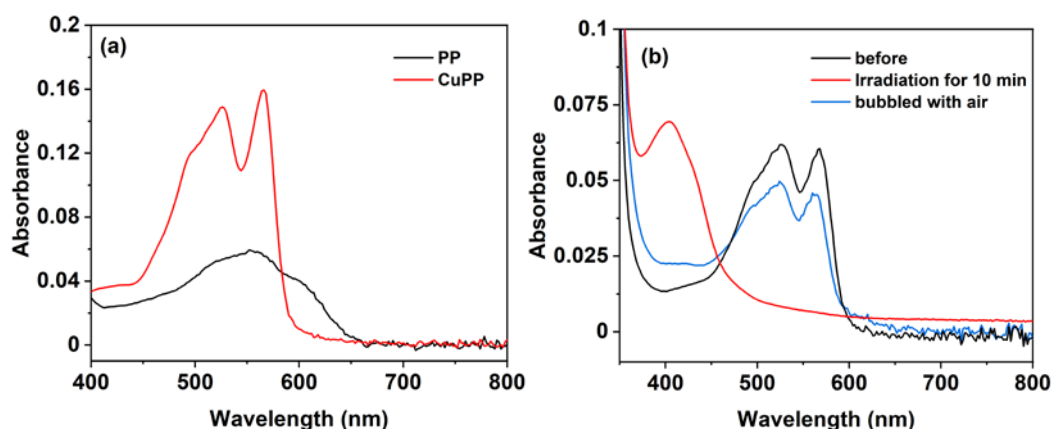

**Supplementary Figure 34. UV-vis absorption spectra.** UV-vis absorption spectra of systems containing: (a) 0.1 mM CuPP (red) or 0.2 mM PP (black), 0.04  $\mu\text{M}$  FeTDHPP and 20 mM BIH (spectra taken with dilution factor of 5); (b) 0.1 mM CuPP, 0.2  $\mu\text{M}$  FeTDHPP and 100 mM BIH before irradiation (black), irradiation for 10 minutes (red) then bubbled with air (blue) (spectra taken with dilution factor of 50). Condition: (a) 2 mm path length quartz cuvette; (b) 1 cm path length quartz cuvette.

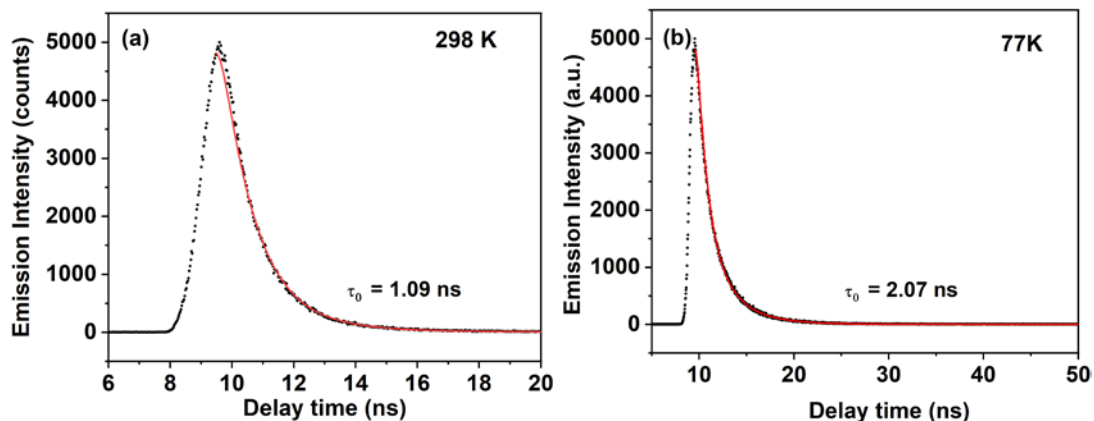

**Supplementary Figure 35. Emission decay.** Emission decay of PP (50 μM) in DMF at 298K (a) or 77K (b).

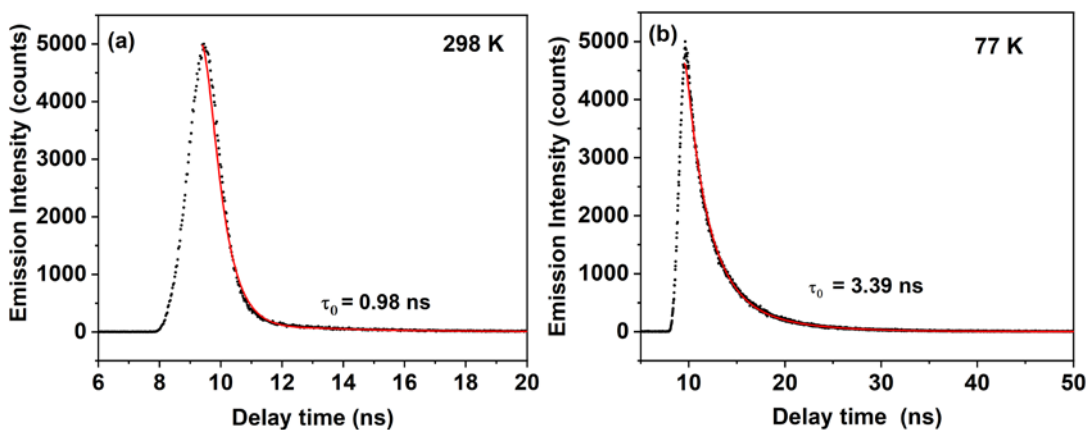

**Supplementary Figure 36. Emission decay.** Emission decay of CuPP (25 μM) in DMF at 298K (a) and 77K (b).

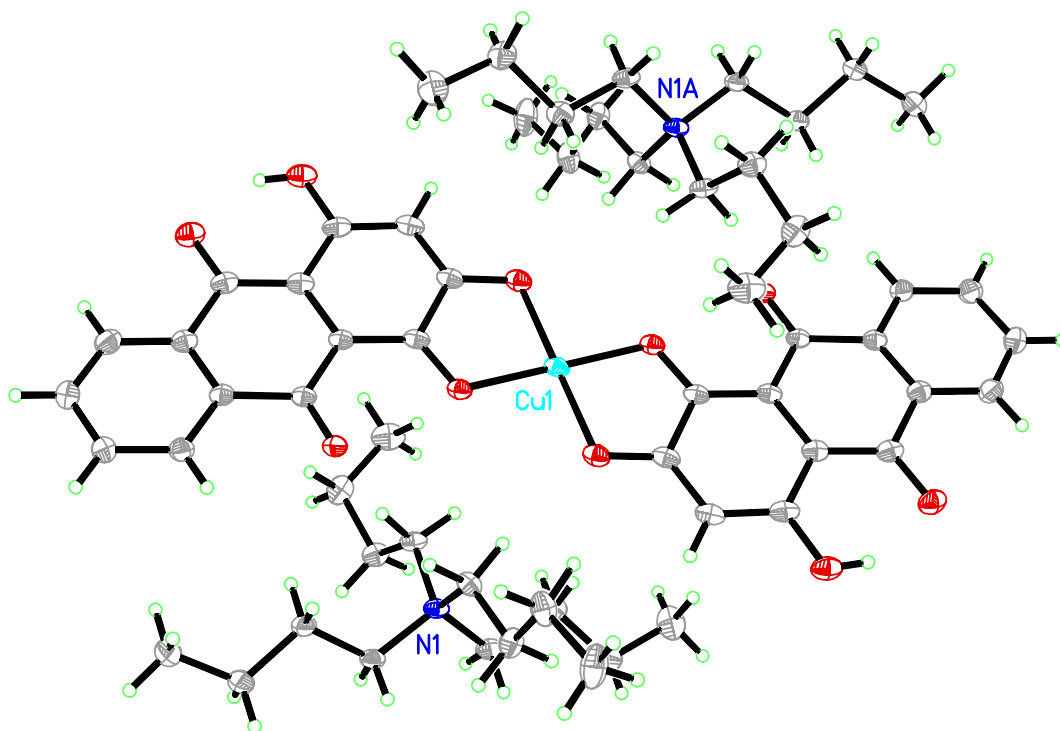

**Supplementary Figure 37. Crystal structure of CuPP.** Complete ORTEP diagram of CuPP at 50% probability.

**Supplementary Table 1. Cu-O bond lengths (Å) of Cu catecholate complexes**

| Cu-Complex                                          | Cu-O1                   | Cu-O2                   | Reference |
|-----------------------------------------------------|-------------------------|-------------------------|-----------|
| CuPP                                                | 1.9268(17) <sup>a</sup> | 1.9168(18) <sup>a</sup> | This work |
| bis(catecholato)Cu                                  | 1.9165(4) <sup>a</sup>  | 1.9303(3) <sup>a</sup>  | 2         |
| Cu(py) <sub>2</sub> (Lw) <sub>2</sub>               | 2.454(2) <sup>b</sup>   | 1.945(2) <sup>c</sup>   | 3         |
| Cu(Lw) <sub>2</sub> (H <sub>2</sub> O) <sub>2</sub> | 2.336(2) <sup>b</sup>   | 1.954(3) <sup>a</sup>   | 4         |
| Cu(L1) <sub>2</sub> (EtOH) <sub>2</sub>             | 2.225(2) <sup>b</sup>   | 1.9301(17) <sup>a</sup> | 5         |
| Cu(Lap) <sub>2</sub> (DMF) <sub>2</sub>             | 2.301(1) <sup>b</sup>   | 1.914(1) <sup>a</sup>   | 6         |
| CuL <sub>2</sub> py <sub>2</sub>                    | 2.415(4) <sup>b</sup>   | 1.948(2) <sup>c</sup>   | 7         |

<sup>a</sup>phenoxy coordination; <sup>b</sup>quinonic carbonyl coordination; <sup>c</sup>enolic coordination;

**Supplementary Table 2. Summary of photophysical data of PP and CuPP.**  
 Photophysical parameters of PP and CuPP at 298 K in DMF solutions

| Sample | Medium | Absorbance                        |                                                                 | Fluorescence                      |                              |             |                                        |                                         |
|--------|--------|-----------------------------------|-----------------------------------------------------------------|-----------------------------------|------------------------------|-------------|----------------------------------------|-----------------------------------------|
|        |        | $\lambda_{\text{max}}(\text{nm})$ | $\epsilon_{\lambda_{\text{max}}}(\text{M}^{-1} \text{cm}^{-1})$ | $\lambda_{\text{max}}(\text{nm})$ | $\Phi_{\text{F}}^{\text{a}}$ | $\tau$ (ns) | $k_{\text{F}}/10^7$ (s <sup>-1</sup> ) | $k_{\text{NF}}/10^9$ (s <sup>-1</sup> ) |
| PP     | DMF    | 478                               | 9940                                                            | 582 <sup>b</sup>                  | $2.7 \times 10^{-2}$         | 1.1         | 2.5                                    | 0.88                                    |
| CuPP   | DMF    | 566                               | 38530                                                           | 693 <sup>c</sup>                  | $8.2 \times 10^{-3}$         | 0.98        | 0.84                                   | 1.01                                    |

<sup>a</sup> Measured under N<sub>2</sub>, by absolute method using an integrating sphere, error 1-20 %. <sup>b</sup>  $\lambda_{\text{exc}} = 484$  nm; <sup>c</sup>  $\lambda_{\text{exc}} = 540$  nm.

**Supplementary Table 3. Thermodynamic driving force for electron transfer of photocatalytic systems**

| Photosensitizers | $E_{\text{red}} / \text{V}$ | $E_{0,0} / \text{eV}$ | $E_{\text{red}}^* / \text{V}$ | $E_{\text{ox}}^* / \text{V}$ | $\Delta G / \text{eV}$ |
|------------------|-----------------------------|-----------------------|-------------------------------|------------------------------|------------------------|
| PP               | -1.21                       | 2.34                  | 1.13                          | -1.47                        | -0.8                   |
| CuPP             | -1.75                       | 2.12                  | 0.37                          | -1.61                        | -0.04                  |

$E_{0,0}$  values were determined from the intersection of the normalized absorption and emission spectra of the CuPP, in  $\text{CO}_2$ -saturated DMF solution, and converted to  $\text{eV}^8$ . The ground state redox potentials ( $E_{\text{ox}}$  and  $E_{\text{red}}$ ) were measured by electrochemical methods (CVs). The excited state redox potentials were obtained as follows: ESOP (Excited State Oxidation Potential) =  $E_{\text{ox}}(\text{CuPP}^*) = E_{\text{ox}} - E_{0,0}$ ; ESRP (Excited State Reduction Potential) =  $E_{\text{red}}(\text{CuPP}^*) = E_{\text{red}} + E_{0,0}$ . The thermodynamic driving force for electron transfer were calculated from Rehm-Weller equation: the difference between reduction potential of excited state of photosensitizer and oxidation potential of BIH as sacrificial reagent. ( $\Delta G = E_{(D+D)}^0 - E_{(A/A-)}^0 - E_{0,0} - e^2/\epsilon d$ ). The last term which represents the columbic attraction energy was neglected because of small contribution to the overall energy. Therefore, the equation was simplified to  $\Delta G = E_{\text{ox}}(\text{BIH}) - E_{\text{red}}^*(\text{CuPP})$  where  $E_{\text{ox}}(\text{BIH})$  was +0.33 V (vs SCE). Potentials are given versus SCE.



**Supplementary Table 4. Control experiments for photocatalytic CO<sub>2</sub> reduction.**

Control experiments for photocatalytic CO<sub>2</sub> reduction in a 5 mL CO<sub>2</sub>-saturated DMF solution containing FeTDHPP (1 μM), CuPP (0.1 mM), and BIH (100 mM), under irradiation with white LED light for 23h at 25 °C.

| Entry <sup>[a]</sup> | FeTDHPP (μM) | CO (μmol) | H <sub>2</sub> (μmol) | TON <sub>CO</sub> | TON <sub>H<sub>2</sub></sub> | Selectivity to CO |
|----------------------|--------------|-----------|-----------------------|-------------------|------------------------------|-------------------|
| 1                    | 1            | 43        | 0.72                  | 8600              | 144                          | 98%               |
| 2                    | 0            | 2.2       | 0                     | -                 | -                            | 0                 |
| 3                    | 1            | 0         | 0                     | 0                 | 0                            | 0                 |
| 4                    | 1            | 0         | 7.3                   | 0                 | 1466                         | 0                 |
| 5                    | 1            | 0         | 0                     | 0                 | 0                            | 0                 |
| 6                    | 1            | 0         | 0                     | 0                 | 0                            | 0                 |
| 7                    | 0.2          | 16.1      | 0.84                  | 16109             | 843                          | 95%               |
| 8                    | 2            | 59.6      | 0.63                  | 5963              | 63                           | 99%               |
| 9                    | 1            | 41        | 0                     | 8183              | 0                            | 100%              |
| 10                   | 5            | 84.6      | 1.08                  | 3385              | 43                           | 99%               |
| 11                   | 10           | 156.5     | 0.62                  | 3131              | 12                           | 99%               |

[a] Entry 1: under CO<sub>2</sub> atmosphere, Entry 2: without FeTDHPP, Entry 3: without CuPP, Entry 4: under N<sub>2</sub> atmosphere, Entry 5: Experiments were carried out in the dark, Entry 6: without BIH; Entry 7: 0.2 μM FeTDHPP, Entry 8: 2 μM FeTDHPP, Entry 9: added 0.02 mL Hg, Entry 10: 5 μM FeTDHPP, Entry 11: 10 μM FeTDHPP.

**Supplementary Table 5.** The performance of photocatalytic CO<sub>2</sub> reduction with molecular complexes containing copper complexes photosensitizers in noble-metal-free systems in the literature.

| Photosensitizer                                                                                                              | Catalyst                                                                              | Solvent                            | Electron donor | Initial TOF <sub>CO</sub> (h <sup>-1</sup> ) | TON <sub>CO</sub> | TON <sub>H<sub>2</sub></sub> | Sel <sub>CO</sub> (%) <sup>a</sup> | Light source               | Reference        |
|------------------------------------------------------------------------------------------------------------------------------|---------------------------------------------------------------------------------------|------------------------------------|----------------|----------------------------------------------|-------------------|------------------------------|------------------------------------|----------------------------|------------------|
| CuPP (PP = purpurin)                                                                                                         | FeTDHPP (0.2 μM)                                                                      | DMF                                | BIH            | 7650                                         | 16109             | 843                          | 95                                 | white LED (λ > 400 nm)     | <b>This work</b> |
| in-situ formed [Cu(xantphos)(bathocuproine)] <sup>+</sup>                                                                    | Mn(pyrox)(CO) <sub>3</sub> Br (0.01 μmol)                                             | CH <sub>3</sub> CN/TEOA (5:1, v/v) | BIH            | -                                            | 1058              | 0                            | 100                                | Hg lamp (λ > 415 nm)       | 9                |
| Cu (P <sup>^</sup> P-(SO <sub>3</sub> Na) <sub>2</sub> )(N <sup>^</sup> N(SO <sub>3</sub> Na) <sub>2</sub> )]BF <sub>4</sub> | CoTMPyP (10 μM)                                                                       | H <sub>2</sub> O                   | AscHNa         | 2600                                         | 2680              | 820                          | 77                                 | Xe lamp (λ > 400 nm)       | 10               |
| in-situ formed [Cu(xantphos)(bathocuproine)] <sup>+</sup>                                                                    | {[Fe <sup>III</sup> (LN4H <sub>2</sub> )Cl] <sub>2</sub> (μ-O)} <sup>2+</sup> (25 μM) | DMF/TEOA (4:1, v/v)                | BIH            | 114                                          | 565               | 116                          | 84                                 | Xe lamp (λ > 400 nm)       | 11               |
| [Cu <sub>2</sub> (P <sub>2</sub> bph) <sub>2</sub> ] <sup>2+</sup>                                                           | fac-Mn(X <sub>2</sub> bpy)(CO) <sub>3</sub> Br (50 μM)                                | DMA/TEOA (4:1, v/v)                | BIH            | -                                            | 1004              | 68                           | 95                                 | Hg lamp (λ > 436 nm)       | 12               |
| in-situ formed [Cu(xantphos)(bathocuproine)] <sup>+</sup>                                                                    | Fe <sup>II</sup> cyclopentadienone (130 μM)                                           | NMP/TEOA (5:1, v/v)                | BIH            | -                                            | 487               | 7                            | 99                                 | Hg lamp (λ = 400 – 700 nm) | 13               |
| Cu(dmp)(P) <sub>2</sub> <sup>+</sup>                                                                                         | Fe(dmp) <sub>2</sub> (NCS) <sub>2</sub> (50 μM)                                       | CH <sub>3</sub> CN/TEOA (5:1, v/v) | BIH            | -                                            | 273               | 75                           | 78                                 | Hg lamp (λ = 436 nm)       | 14               |

<sup>a</sup>Sel<sub>CO</sub>: selectivity of CO production among all possible CO<sub>2</sub> reduction products

**Supplementary Table 6.** The performance of photocatalytic CO<sub>2</sub> reduction with molecular complexes containing organic photosensitizers in noble-metal-free systems in the literature

| Photosensitizer                                 | Catalyst                                                       | Solvent                           | Electron donor | Initial TOF <sub>CO</sub> (h <sup>-1</sup> ) | TON <sub>CO</sub> | TON <sub>H<sub>2</sub></sub> | Sel <sub>CO</sub> (%) <sup>a</sup> | Light source                        | Reference |
|-------------------------------------------------|----------------------------------------------------------------|-----------------------------------|----------------|----------------------------------------------|-------------------|------------------------------|------------------------------------|-------------------------------------|-----------|
| 9-CNA                                           | FeTDHPP (2 μM)                                                 | MeCN                              | TEA            | -                                            | 60                | 0                            | 100                                | Xe lamp (λ > 400 nm)                | 15        |
| Non-sensitized                                  | Fe- <i>p</i> -TMA (2 μM)                                       | MeCN                              | BIH            | -                                            | 101               | 0                            | 100                                | solar simulator, 1 sun (λ > 420 nm) | 16        |
| Non-sensitized                                  | FeTDHPP (10 μM)                                                | MeCN                              | TEA            | 6.3                                          | 30                | 10                           | 75                                 | Xe lamp (cut off IR and low UV)     | 17        |
| 3,7-di(4-biphenyl)-1-naphthalene-10-phenoxazine | Fe- <i>p</i> -TMA (10 μM)                                      | DMF                               | TEA            | -                                            | 140               | 23                           | 73                                 | solar simulator, 1 sun (λ > 435 nm) | 18        |
| Purpurin                                        | Fe- <i>p</i> -TMA (2 μM)                                       | MeCN/H <sub>2</sub> O (1:9, v/v)  | TEA            | -                                            | 60                | 3                            | 95                                 | solar simulator, 1 sun (λ > 420 nm) | 19        |
| Purpurin                                        | [Fe(dqtpy)(H <sub>2</sub> O)] <sup>2+</sup> (50 μM)            | DMF                               | BIH            | -                                            | 544               | 4                            | 99.3                               | blue LED (λ = 460 nm)               | 20        |
| Purpurin                                        | [Fe(qpy)(H <sub>2</sub> O) <sub>2</sub> ] <sup>2+</sup> (5 μM) | DMF                               | BIH            | -                                            | 1365              | 0                            | 92                                 | blue LED (λ = 460 nm)               | 1         |
| Purpurin                                        | [Co(qpy)(H <sub>2</sub> O) <sub>2</sub> ] <sup>2+</sup> (5 μM) | DMF                               | BIH            | -                                            | 790               | 11                           | 90                                 |                                     |           |
| ZnTPP                                           | <i>fac</i> -[Mn(phen)(CO)Br] (50 μM)                           | MeCN/H <sub>2</sub> O (20:1, v/v) | TEA            | -                                            | 119               | 0                            | 86                                 | Xe lamp (500 W)                     | 21        |
| 4CzIPN                                          | FeTotpy (10 μM)                                                | DMF/H <sub>2</sub> O (3:2, v/v)   | TEA            | 3600                                         | 2250              | 16                           | 99.3                               | white LEDs (λ = 420-650 nm)         | 22        |
| <i>p</i> -terphenyl                             | Co <sup>II</sup> [TBPC] (20 μM)                                | MeCN                              | TEA            | -                                            | 50                | -                            | 100                                | Xe lamp (λ > 310 nm)                | 23        |

<sup>a</sup>Sel<sub>CO</sub>: selectivity of CO production among all possible CO<sub>2</sub> reduction products

**Supplementary Table 7.** The performance of photocatalytic CO<sub>2</sub> reduction with molecular complexes containing nanostructured photosensitizers in noble-metal-free systems in the literature

| Photosensitizer                   | Catalyst                                                           | Solvent                 | Electron donor    | Initial TOF <sub>CO</sub> (h <sup>-1</sup> ) | TON <sub>CO</sub> | TON <sub>H<sub>2</sub></sub> | Sel <sub>CO</sub> (%) <sup>a</sup> | Light source                                    | Reference |
|-----------------------------------|--------------------------------------------------------------------|-------------------------|-------------------|----------------------------------------------|-------------------|------------------------------|------------------------------------|-------------------------------------------------|-----------|
| mpg-C <sub>3</sub> N <sub>4</sub> | [Fe(qpy)(H <sub>2</sub> O) <sub>2</sub> ] <sup>2+</sup><br>(20 μM) | MeCN/TEOA<br>(4:1, v/v) | TEOA              | -                                            | 155               | <1                           | 97                                 | Hg lamp (λ ≥ 400 nm)                            | 24        |
| CuInS <sub>2</sub> /ZnS           | Fe- <i>p</i> -TMA<br>(1 μM)                                        | H <sub>2</sub> O        | TEOA              | -                                            | 450               | 4.5                          | 99                                 | monochromati-c<br>laser pointer (λ =<br>450 nm) | 25        |
| CdS-MPA                           | Dinuclear cobalt<br>complex (1 μM)                                 | H <sub>2</sub> O        | TEOA              | -                                            | 1380              | 32                           | 95                                 | Xe lamp (λ > 420<br>nm)                         | 26        |
| ZnSe                              | Ni(cyclam)Cl <sub>2</sub><br>(10 μM)                               | H <sub>2</sub> O        | AcsH <sub>2</sub> | -                                            | 283               | 549                          | 34                                 | solar simulator, 1<br>sun (λ > 400 nm)          | 27        |
| CdS                               | [Ni(terpyS) <sub>2</sub> ] <sup>2+</sup><br>(100 μM)               | H <sub>2</sub> O        | TEOA              | -                                            | 20                | n.r.                         | 93                                 | solar simulator, 1<br>sun (λ > 400 nm)          | 28        |
| CuInS <sub>2</sub> /ZnS           | FeTPP (2 μM)                                                       | DMSO                    | TMPD              | -                                            | 60                | 10                           | 84                                 | monochromati-c<br>laser pointer (λ =<br>450 nm) | 29        |

<sup>a</sup>Sel<sub>CO</sub>: selectivity of CO production among all possible CO<sub>2</sub> reduction products

**Supplementary Table 8.** Homogeneous photocatalytic CO<sub>2</sub> reduction system containing porphyrin complex and noble metal photosensitizer

| Photosensitizer                      | Catalyst                 | Solvent          | Electron donor | Initial TOF <sub>CO</sub> (h <sup>-1</sup> ) | TON <sub>CO</sub> | TON <sub>H<sub>2</sub></sub> | Sel <sub>CO</sub> (%) <sup>a</sup> | Light source                | Reference |
|--------------------------------------|--------------------------|------------------|----------------|----------------------------------------------|-------------------|------------------------------|------------------------------------|-----------------------------|-----------|
| Ru(bpy) <sub>3</sub> Cl <sub>2</sub> | CoTPPS (0.5 μM)          | H <sub>2</sub> O | AscHNa         | 2400                                         | 4000              | 5756                         | 41                                 | Xe lamp (λ > 400 nm)        | 30        |
| <i>fac</i> -Ir(ppy) <sub>3</sub>     | FeTDHPP (2 μM)           | MeCN             | TEA            | -                                            | 140               | 11                           | 93                                 | Xe lamp (λ > 420 nm)        | 15        |
| <i>fac</i> -Ir(ppy) <sub>3</sub>     | FeTDHPP (2 μM)           | MeCN             | TEA            | -                                            | 139               | 15                           | 77                                 | Solar simulator(λ > 420 nm) | 31        |
| <i>fac</i> -Ir(ppy) <sub>3</sub>     | Fe- <i>p</i> -TMA (2 μM) | MeCN             | TEA            | -                                            | 367               | 26                           | 78                                 | Solar simulator(λ > 420 nm) | 31        |
| Ir(ppy) <sub>2</sub> (bpy)           | Fe- <i>p</i> -TMA (2 μM) | MeCN             | TEA            | -                                            | 178               | 103                          | 57                                 | Solar simulator(λ > 420 nm) | 32        |

<sup>a</sup>Sel<sub>CO</sub>: selectivity of CO production among all possible CO<sub>2</sub> reduction products

**Supplementary Table 9. Crystal data and structure refinement for CuPP**

| <b>Compound</b>                             | <b>CuPP</b>                                                       |
|---------------------------------------------|-------------------------------------------------------------------|
| CCDC                                        | 2017326                                                           |
| Empirical formula                           | C <sub>60</sub> H <sub>84</sub> N <sub>2</sub> O <sub>10</sub> Cu |
| Formula weight                              | 1056.83                                                           |
| Temperature/K                               | 100.0                                                             |
| Crystal system                              | monoclinic                                                        |
| Space group                                 | <i>P</i> 2 <sub>1</sub> / <i>c</i>                                |
| a/Å                                         | 8.19435(8)                                                        |
| b/Å                                         | 17.13881(17)                                                      |
| c/Å                                         | 20.00751(17)                                                      |
| $\alpha$ /°                                 | 90                                                                |
| $\beta$ /°                                  | 101.6430(9)                                                       |
| $\gamma$ /°                                 | 90                                                                |
| Volume/Å <sup>3</sup>                       | 2752.07(5)                                                        |
| Z                                           | 2                                                                 |
| $\rho_{\text{calc}}$ /cm <sup>3</sup>       | 1.275                                                             |
| $\mu$ /mm <sup>-1</sup>                     | 1.040                                                             |
| F(000)                                      | 1134.0                                                            |
| Crystal size/mm <sup>3</sup>                | 0.18 × 0.12 × 0.07                                                |
| Radiation                                   | CuK $\alpha$ ( $\lambda$ = 1.54184)                               |
| 2 $\theta$ range for data collection/°      | 6.86 to 152.38                                                    |
| Index ranges                                | -10 ≤ h ≤ 10, -21 ≤ k ≤ 21, -25 ≤ l ≤ 25                          |
| Reflections collected                       | 40969                                                             |
| Independent reflections                     | 5720 [R <sub>int</sub> = 0.0372, R <sub>sigma</sub> = 0.0166]     |
| Data/restraints/parameters                  | 5720/0/336                                                        |
| Goodness-of-fit on F <sup>2</sup>           | 1.094                                                             |
| Final R indexes [I ≥ 2 $\sigma$ (I)]        | R <sub>1</sub> = 0.0606, wR <sub>2</sub> = 0.1606                 |
| Final R indexes [all data]                  | R <sub>1</sub> = 0.0617, wR <sub>2</sub> = 0.1613                 |
| Largest diff. peak/hole / e Å <sup>-3</sup> | 0.74/-0.34                                                        |

**Supplementary Table 10. Selected bond lengths (Å) and angels (°) of CuPP**

| <b>Selected bond lengths (Å)</b> |            |          |          |          |          |          |
|----------------------------------|------------|----------|----------|----------|----------|----------|
| Cu-O1                            | Cu-O2      | O1-C1    | O2-C2    | O3-C4    | O5-C13   | O4-C11   |
| 1.9268(17)                       | 1.9168(18) | 1.303(3) | 1.295(3) | 1.239(3) | 1.342(3) | 1.274(3) |

  

| <b>Selected angels (°)</b> |            |           |            |
|----------------------------|------------|-----------|------------|
| O1-Cu-O1A                  | 180.00     | O2-Cu-O2A | 180.00     |
| O1-Cu-O2                   | 85.03(7)   | O1-Cu-O2A | 94.97(7)   |
| O1A-Cu-O2A                 | 85.03(7)   | O1A-Cu-O2 | 94.97(7)   |
| C1-O1-Cu                   | 111.61(14) | C2-O2-Cu  | 112.23(14) |

## Supplementary References

1. Guo, Z. *et al.* Highly efficient and selective photocatalytic CO<sub>2</sub> reduction by iron and cobalt quaterpyridine complexes. *J. Am. Chem. Soc.* **138**, 9413-9416, (2016).
2. Tapodi, B. *et al.* Preparation and X-ray structure of a (catecholato)copper(II) complex with a schönberg adduct. *Inorg. Chem. Commun.* **9**, 367-370, (2006).
3. Peng, S-M. *et al.* Crystal and molecular structure of hydroxynaphthoquinone complex.I. The structure of bis(pyridine)bis(lawsone) copper (II) complex. *Proc. Natl. Sci. Coun. B, ROC* **5(2)**,139-144, (1981).
4. Salunke-Gawali, S., Rane, S. Y., Puranik, V. G., Guyard-Duhayon, C. & Varret, F. Three dimensional hydrogen-bonding network in a copper complex of 2-hydroxy-1,4-naphthoquinone: Structural, spectroscopic and magnetic properties. *Polyhedron* **23**, 2541-2547, (2004).
5. Gokhale, N. H. *et al.* Transition metal complexes of buparvaquone as potent new antimalarial agents: 1. Synthesis, x-ray crystal-structures, electrochemistry and antimalarial activity against plasmodium falciparum. *J. Inorg. Biochem.* **95**, 249-258, (2003).
6. Farfán, R. A. *et al.* Structural and spectroscopic properties of two new isostructural complexes of lapacholate with cobalt and copper. *Int. J. Inorg. Chem.* **2012**, 973238, (2012).
7. Hernández-Molina, R. *et al.* Complexes of Co(II), Ni(II) and Cu(II) with lapachol. *Polyhedron* **26**, 4860-4864, (2007).
8. Mejía, E. *et al.* A noble-metal-free system for photocatalytic hydrogen production from water. *Chem. Eur. J.* **19**, 15972-15978, (2013).
9. Steinlechner, C. *et al.* Selective earth-abundant system for CO<sub>2</sub> reduction: Comparing photo- and electrocatalytic processes. *ACS Catal.* **9**, 2091-2100, (2019).
10. Zhang, X., Cibian, M., Call, A., Yamauchi, K. & Sakai, K. Photochemical CO<sub>2</sub> reduction driven by water-soluble copper(I) photosensitizer with the catalysis accelerated by multi-electron chargeable cobalt porphyrin. *ACS Catal.* **9**, 11263-11273, (2019).
11. Sakaguchi, Y., Call, A., Cibian, M., Yamauchi, K. & Sakai, K. An earth-abundant system for light-driven CO<sub>2</sub> reduction to CO using a pyridinophane iron catalyst. *Chem. Commun.* **55**, 8552-8555, (2019).
12. Takeda, H. *et al.* Highly efficient and robust photocatalytic systems for CO<sub>2</sub> reduction consisting of a Cu(I) photosensitizer and Mn(I) catalysts. *J. Am. Chem. Soc.* **140**, 17241-17254, (2018).
13. Rosas-Hernández, A., Steinlechner, C., Junge, H. & Beller, M. Earth-abundant photocatalytic systems for the visible-light-driven reduction of CO<sub>2</sub> to CO. *Green Chem.* **19**, 2356-2360, (2017).
14. Takeda, H., Ohashi, K., Sekine, A. & Ishitani, O. Photocatalytic CO<sub>2</sub> reduction using Cu(I) photosensitizers with a Fe(II) catalyst. *J. Am. Chem. Soc.* **138**, 4354-4357, (2016).
15. Bonin, J., Robert, M. & Routier, M. Selective and efficient photocatalytic CO<sub>2</sub> reduction to CO using visible light and an iron-based homogeneous catalyst. *J. Am. Chem. Soc.* **136**, 16768-16771, (2014).
16. Rao, H., Bonin, J. & Robert, M. Non-sensitized selective photochemical reduction of CO<sub>2</sub> to CO under visible light with an iron molecular catalyst. *Chem. Commun.* **53**, 2830-2833, (2017).
17. Bonin, J., Chaussemier, M., Robert, M. & Routier, M. Homogeneous photocatalytic reduction of CO<sub>2</sub> to CO using iron(0) porphyrin catalysts: Mechanism and intrinsic limitations. *ChemCatChem* **6**, 3200-3207, (2014).
18. Rao, H., Lim, C.-H., Bonin, J., Miyake, G. M. & Robert, M. Visible-light-driven conversion of CO<sub>2</sub>



- to CH<sub>4</sub> with an organic sensitizer and an iron porphyrin catalyst. *J. Am. Chem. Soc.* **140**, 17830-17834, (2018).
19. Rao, H., Bonin, J. & Robert, M. Visible-light homogeneous photocatalytic conversion of CO<sub>2</sub> into CO in aqueous solutions with an iron catalyst. *ChemSusChem* **10**, 4447-4450, (2017).
  20. Chen, L. *et al.* A molecular noble metal-free system for efficient visible light-driven reduction of CO<sub>2</sub> to CO. *Dalton Trans.* **48**, 9596-9602, (2019).
  21. Zhang, J.-X., Hu, C.-Y., Wang, W., Wang, H. & Bian, Z.-Y. Visible light driven reduction of CO<sub>2</sub> catalyzed by an abundant manganese catalyst with zinc porphyrin photosensitizer. *Appl. Catal. A.* **522**, 145-151, (2016).
  22. Wang, Y., Gao, X.-W., Li, J. & Chao, D. Merging an organic TADF photosensitizer and a simple terpyridine-Fe(III) complex for photocatalytic CO<sub>2</sub> reduction. *Chem. Commun.*, (2020).
  23. Grodkowski, J. *et al.* Reduction of cobalt and iron phthalocyanines and the role of the reduced species in catalyzed photoreduction of CO<sub>2</sub>. *J. Phys. Chem. A* **104**, 11332-11339, (2000).
  24. Cometto, C. *et al.* A carbon nitride/Fe quaterpyridine catalytic system for photostimulated CO<sub>2</sub>-to-CO conversion with visible light. *J. Am. Chem. Soc.* **140**, 7437-7440, (2018).
  25. Lian, S., Kodaimati, M. S. & Weiss, E. A. Photocatalytically active superstructures of quantum dots and iron porphyrins for reduction of CO<sub>2</sub> to CO in water. *ACS Nano* **12**, 568-575, (2018).
  26. Bi, Q.-Q. *et al.* Selective photocatalytic CO<sub>2</sub> reduction in water by electrostatic assembly of CdS nanocrystals with a dinuclear cobalt catalyst. *ACS Catal.* **8**, 11815-11821, (2018).
  27. Kuehnel, M. F. *et al.* ZnSe quantum dots modified with a Ni(cyclam) catalyst for efficient visible-light driven CO<sub>2</sub> reduction in water. *Chem. Sci.* **9**, 2501-2509, (2018).
  28. Kuehnel, M. F., Orchard, K. L., Dalle, K. E. & Reisner, E. Selective photocatalytic CO<sub>2</sub> reduction in water through anchoring of a molecular Ni catalyst on CdS nanocrystals. *J. Am. Chem. Soc.* **139**, 7217-7223, (2017).
  29. Lian, S., Kodaimati, M. S., Dolzhenkov, D. S., Calzada, R. & Weiss, E. A. Powering a CO<sub>2</sub> reduction catalyst with visible light through multiple sub-picosecond electron transfers from a quantum dot. *J. Am. Chem. Soc.* **139**, 8931-8938, (2017).
  30. Call, A. *et al.* Highly efficient and selective photocatalytic CO<sub>2</sub> reduction to CO in water by a cobalt porphyrin molecular catalyst. *ACS Catal.* **9**, 4867-4874, (2019).
  31. Rao, H., Schmidt, L. C., Bonin, J. & Robert, M. Visible-light-driven methane formation from CO<sub>2</sub> with a molecular iron catalyst. *Nature* **548**, 74-77, (2017).
  32. Rao, H., Bonin, J. & Robert, M. Toward visible-light photochemical CO<sub>2</sub>-to-CH<sub>4</sub> conversion in aqueous solutions using sensitized molecular catalysis. *J. Phys. Chem. C* **122**, 13834-13839, (2018).
